# Supplementary material for: Cooperative catalysis in highly enantioselective Mannich-type three-component reaction of a diazoacetophenone with an alcohol and an imine
Source: Royal Society of Chemistry journal article supplement (doi:10.1039/c0cc03024d), 2010-11-29
Supplement: c0cc03024d.pdf [file c0cc03024d.pdf]

**Supporting Information**  
**Cooperative Catalysis in Highly Enantioselective**  
**Mannich-type Three-component Reactions of a**  
**Diazoacetophenone with an Alcohol and an Imine**

Xinfang Xu, Yu Qian, Liping Yang and Wenhao Hu\*

*Institute of Drug Discovery and Development, and Department of Chemistry, East*

*China Normal University, Shanghai, 200062, China*

*E-mail: whu@chem.ecnu.edu.cn*

## **Table of Contents**

1. General & Materials
2. General Procedure
3. NMR, Chiral HPLC and HRMS(ESI) analysis data of the products
4. Control Experiment and Derivation
5. References
6. NMR and Chiral HPLC analysis figures of the products

**General:** HRMS (ESI) Mass spectra were recorded on Bruker micrOTOF-II mass spectrometer. NMR spectra were recorded on a Bruker-400 MHz spectrometer. HPLC analysis was performed on Shimadzu (SPD-20AV UV-VIS Detector and LC-20AT Liquid Chromatograph Pump). Chiralpak OD, AD, AD-H, IA were purchased from Daicel Chemical Industries, LTD. The racemic standards used in HPLC studies were prepared according to the general procedure by using racemic BINOL derivatived phosphoric acid catalysts.

**Materials:** Dichloromethane was distilled from calcium hydride. Diazo compounds **1** were prepared according to the literature procedure.<sup>1</sup> Imines **3** were prepared by condensation of corresponding aldehydes and amines.<sup>2</sup> Cyclohexanecarboxaldehyde was purchased from ACROS. Chiral phosphoric acid **5** were prepared according to the literature procedure.<sup>3</sup> Solvents for the column chromatography were distilled before using.

**General Procedure for the Enantioselective Three-component Reaction of 9-anthryl Alcohol (2a) With Various Diazo Compounds 1 and Imines 3 (Table 2 in the manuscript):**

To an flame-dried vial,  $\text{Rh}_2(\text{OAc})_4$  (0.004 mmol), chiral phosphoric acid **5f** (0.01 mmol), alcohol **2a** (0.20 mmol), imine **3** (0.20 mmol) and 5Å MS (0.1 g) were added and charged with 1.5 mL toluene. Diazo compound **1** (0.24 mmol) in 0.5 mL of toluene was then added over 1 h period of time via a syringe pump at room temperature. After completion of the addition, the reaction mixture was stirred for additional 3 h and followed by addition of saturated aqueous  $\text{NaHCO}_3$  (0.1 mL) to quench the reaction. Solvents were removed to give the crude products, which were subjected to  $^1\text{H}$  NMR spectroscopy analysis for the determination of diastereoselectivity. The crude products were purified by flash chromatography on silica gel (eluent: EtOAc/light petroleum ether = 1:50 ~1:30) to give the pure products.

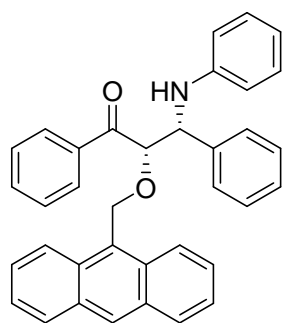

**(4a):** yield 85%; 90% ee, determined by HPLC (Daicel Chirapak IA, flow rate 1.0 mL/min, hexane/isopropanol/EtOH = 450: 25: 25, 254nm, Retention time:  $t_{\text{major}} = 9.2$  min, and  $t_{\text{minor}} = 12.4$  min.);  $^1\text{H}$  NMR ( $\text{CDCl}_3$ , 500 MHz):  $\delta$  (ppm) 4.80 (br, 1H), 4.90 (m, 1H), 5.14 (m, 1H), 5.32 (d,  $J = 11.5$  Hz, 1H), 5.66 (d,  $J = 11.5$  Hz, 1H), 6.30-8.07 (m, 23H), 8.49 (s, 1H);  $^{13}\text{C}$  NMR ( $\text{CDCl}_3$ , 100 MHz):  $\delta$  (ppm) 59.36, 64.71, 84.52, 113.58, 117.41, 124.30, 124.97, 126.40, 127.04, 127.15, 127.37, 128.44, 128.74, 128.81, 128.82, 128.86, 131.18, 131.29, 133.34; 135.93, 139.69, 146.62, 198.57; HRMS (ESI) calcd for  $\text{C}_{36}\text{H}_{29}\text{NNaO}_2$  ( $\text{M}+\text{Na}$ ) $^+$  530.2091, found 530.2088.

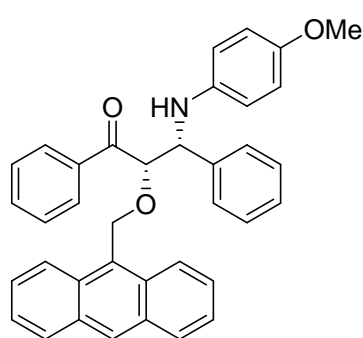

**(4b):** yield 88%; 91% ee, determined by HPLC (Daicel Chirapak AD-H, flow rate 1.0 mL/min, hexane/isopropanol/EtOH = 450: 25: 25, 254nm, Retention time:  $t_{\text{major}} = 15.5$  min, and  $t_{\text{minor}} = 21.3$  min.);  $^1\text{H}$  NMR ( $\text{CDCl}_3$ , 500 MHz):  $\delta$  (ppm) 3.60 (s, 3H), 4.50 (br, 1H), 4.80 (m, 1H), 5.08 (m, 1H), 5.25 (d,  $J = 11.0$  Hz, 1H), 5.62 (d,  $J = 11.0$  Hz, 1H), 6.22 (d,  $J = 9.0$  Hz, 2H), 6.51 (d,  $J = 9.0$  Hz, 2H), 7.13-8.03 (m, 18H), 8.46 (s, 1H);  $^{13}\text{C}$  NMR ( $\text{CDCl}_3$ , 125 MHz):  $\delta$  (ppm) 55.59, 60.31, 64.72, 84.85, 114.47, 114.87, 124.30, 124.97, 126.39, 127.15, 127.22, 127.35, 128.42, 128.45, 128.68, 128.83, 131.16, 131.29, 133.24; 136.06, 139.78, 140.84, 151.96, 198.80; HRMS (ESI) calcd for  $\text{C}_{37}\text{H}_{31}\text{NNaO}_3$  ( $\text{M}+\text{Na}$ ) $^+$  560.2196, found 560.2205.

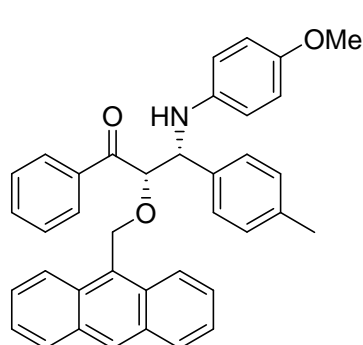

**(4c):** yield 83%;  $[\alpha]_{\text{D}}^{20} = -23.0^\circ$  ( $c = 1$ ,  $\text{CH}_2\text{Cl}_2$ ); 92% ee, determined by HPLC (Daicel Chirapak IA, flow rate 1.0 mL/min, hexane/isopropanol/EtOH = 450: 25: 25, 254nm, Retention time:  $t_{\text{major}} = 11.4$  min, and  $t_{\text{minor}} = 20.0$  min.);  $^1\text{H}$  NMR ( $\text{CDCl}_3$ , 500 MHz):  $\delta$  (ppm) 2.27 (s, 3H), 3.60 (s, 3H), 4.51 (br, 1H), 4.77 (m, 1H), 5.04 (m, 1H), 5.25 (d,  $J = 11.0$  Hz, 1H), 5.61 (d,  $J = 11.0$  Hz, 1H), 6.22 (d,  $J = 9.0$  Hz, 2H), 6.51 (d,  $J = 9.0$  Hz, 2H), 6.90 (d,  $J = 8.0$  Hz, 2H), 7.03 (d,  $J = 8.0$  Hz, 2H), 7.35-8.03 (m, 13H), 8.46 (s, 1H);  $^{13}\text{C}$  NMR ( $\text{CDCl}_3$ , 125 MHz):  $\delta$  (ppm) 21.10, 55.55, 59.92, 64.62, 84.95, 114.39, 114.79, 124.08, 124.91, 126.28, 126.89, 127.21, 127.55, 128.46, 128.53, 128.66, 128.78, 129.06, 131.12, 131.23; 133.20, 136.57, 136.74, 140.87, 151.82, 198.87; HRMS (ESI) calcd for  $\text{C}_{38}\text{H}_{33}\text{NNaO}_3$  ( $\text{M}+\text{Na}$ ) $^+$  574.2353, found 574.2366.

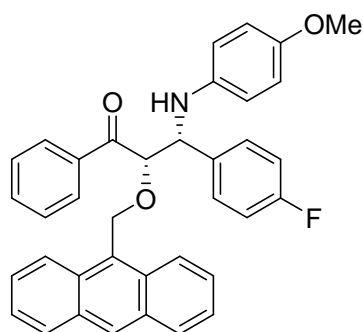

**(4d):** yield 78%; 92% ee, determined by HPLC (Daicel Chirapak IA, flow rate 1.0 mL/min, hexane/isopropanol/EtOH = 450: 25: 25, 254nm, Retention time:  $t_{\text{major}} = 15.6$  min, and  $t_{\text{minor}} = 21.0$  min.);  $^1\text{H}$  NMR ( $\text{CDCl}_3$ , 400 MHz):  $\delta$  (ppm) 3.60 (s, 3H), 4.50 (br, 1H), 4.69 (m, 1H), 4.97 (m, 1H), 5.30 (d,  $J = 12.0$  Hz, 1H), 5.65 (d,  $J = 12.0$  Hz, 1H), 6.18 (d,  $J = 8.8$  Hz, 2H), 6.52 (d,  $J = 8.8$  Hz, 2H), 6.93 (d,  $J = 8.0$  Hz, 2H), 7.12 (d,  $J = 8.0$  Hz, 2H), 7.34-8.01 (m, 13H), 8.46 (s, 1H);  $^{13}\text{C}$  NMR ( $\text{CDCl}_3$ , 125 MHz):  $\delta$  (ppm) 55.59, 59.78, 64.46, 84.29, 114.56, 114.88, 121.26, 123.90, 125.06, 126.51, 126.60, 128.58, 128.98, 129.04, 129.80, 131.08, 131.21, 131.42, 134.14, 138.52, 139.83, 140.22, 152.26, 197.72; HRMS (ESI) calcd for  $\text{C}_{37}\text{H}_{30}\text{FNNaO}_3$  ( $\text{M}+\text{Na}$ ) $^+$  578.2102, found 578.2127.

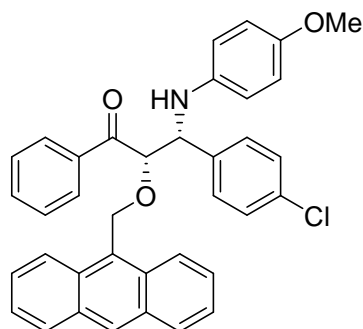

**(4e):** yield 73%;  $[\alpha]_{\text{D}}^{20} = -34.0^\circ$  ( $c = 1$ ,  $\text{CH}_2\text{Cl}_2$ ); 98% ee, determined by HPLC (Daicel Chirapak IA, flow rate 1.0 mL/min, hexane/isopropanol/EtOH = 450: 25: 25, 254nm, Retention time:  $t_{\text{major}} = 15.2$  min, and  $t_{\text{minor}} = 25.0$  min.);  $^1\text{H}$  NMR ( $\text{CDCl}_3$ , 500 MHz):  $\delta$  (ppm) 3.61 (s, 3H), 4.50 (br, 1H), 4.72 (m, 1H), 4.98 (m, 1H), 5.31 (d,  $J = 11.5$  Hz, 1H), 5.65 (d,  $J = 11.5$  Hz, 1H), 6.18 (d,  $J = 9.0$  Hz, 2H), 6.52 (d,  $J = 9.0$  Hz, 2H), 6.79-8.01 (m, 17H), 8.47 (s, 1H);  $^{13}\text{C}$  NMR ( $\text{CDCl}_3$ , 125 MHz):  $\delta$  (ppm) 55.60, 59.57, 64.40, 84.05, 113.69, 114.53, 114.77, 124.09, 125.02, 126.43, 126.90, 128.27, 128.34, 128.43, 128.79, 128.91, 131.14, 131.24, 133.38; 138.27, 140.39, 152.10, 198.56; HRMS (ESI) calcd for  $\text{C}_{37}\text{H}_{30}\text{ClINaO}_3$  ( $\text{M}+\text{Na}$ ) $^+$  594.1806, found 594.1793.

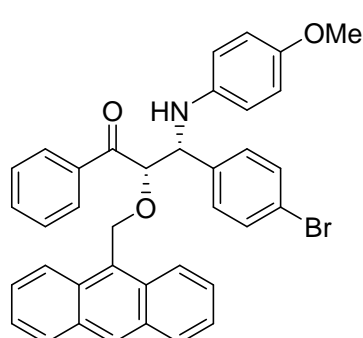

**(4f):** yield 70%;  $[\alpha]_{\text{D}}^{20} = -35.0^\circ$  ( $c = 1$ ,  $\text{CH}_2\text{Cl}_2$ ); 93% ee, determined by HPLC (Daicel Chirapak IA, flow rate 1.0 mL/min, hexane/isopropanol/EtOH = 450: 25: 25, 254nm, Retention time:  $t_{\text{major}} = 14.6$  min, and  $t_{\text{minor}} = 33.1$  min.);  $^1\text{H}$  NMR ( $\text{CDCl}_3$ , 500 MHz):  $\delta$  (ppm) 3.60 (s, 3H), 4.50 (br, 1H), 4.70 (m, 1H), 4.98 (m, 1H), 5.30 (d,  $J = 11.5$  Hz, 1H), 5.65 (d,  $J = 11.5$  Hz, 1H), 6.18 (d,  $J = 9.0$  Hz, 2H), 6.52 (d,  $J = 9.0$  Hz, 2H), 6.94 (d,  $J = 8.5$  Hz, 2H), 7.12 (d,  $J = 8.5$  Hz, 2H), 7.35-8.01 (m, 13H), 8.47 (s, 1H);  $^{13}\text{C}$  NMR ( $\text{CDCl}_3$ , 125 MHz):  $\delta$  (ppm) 55.59, 59.59, 64.39, 83.93, 114.52, 114.73, 121.10, 124.06, 125.03, 126.44, 126.86, 128.32, 128.60, 128.80, 128.90, 129.16, 131.12, 131.22, 131.34; 133.39, 135.90, 138.80, 140.34, 152.08, 198.53; HRMS (ESI) calcd for  $\text{C}_{37}\text{H}_{30}\text{BrNNaO}_3$  ( $\text{M}+\text{K}$ ) $^+$  638.1301, found 638.1329.

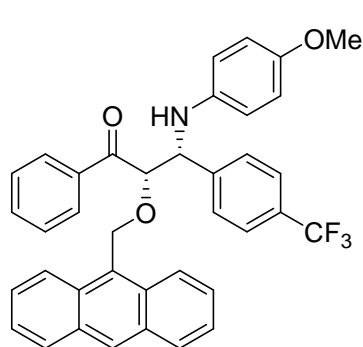

**(4g):** yield 75%; 90% ee, determined by HPLC (Daicel Chirapak IA, flow rate 1.0 mL/min, hexane/isopropanol/EtOH = 450: 25: 25, 254nm, Retention time:  $t_{\text{major}} = 10.9$  min, and  $t_{\text{minor}} = 19.4$  min.);  $^1\text{H}$  NMR ( $\text{CDCl}_3$ , 500 MHz):  $\delta$  (ppm) 3.59 (s, 3H), 4.57 (br, 1H), 4.77 (m, 1H), 5.01 (m, 1H), 5.29 (d,  $J = 11.5$  Hz, 1H), 5.65 (d,  $J = 11.5$  Hz, 1H), 6.17 (d,  $J = 8.5$  Hz, 2H), 6.51 (d,  $J = 8.5$  Hz, 2H), 7.16-7.98 (m, 17H), 8.43 (s, 1H);  $^{13}\text{C}$  NMR ( $\text{CDCl}_3$ , 125 MHz):  $\delta$  (ppm) 55.55, 59.73, 64.24, 83.46, 114.53, 114.64, 123.95, 125.02, 125.14, 125.17, 126.39, 126.71, 127.22, 128.24, 128.83, 128.89, 128.93, 131.08, 131.16, 133.45, 135.82, 140.15, 143.99, 152.12, 198.37; HRMS (ESI) calcd for  $\text{C}_{38}\text{H}_{30}\text{F}_3\text{NNaO}_3$  ( $\text{M}+\text{Na}$ ) $^+$  628.2070, found 628.2093.

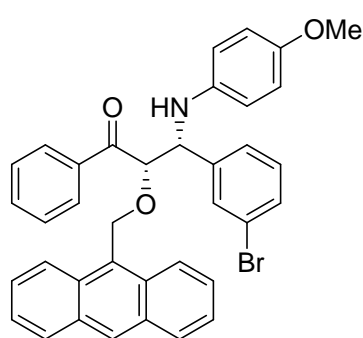

**(4h):** yield 76%; 92% ee, determined by HPLC (Daicel Chirapak IA, flow rate 1.0 mL/min, hexane/isopropanol/EtOH = 450: 25: 25, 254nm, Retention time:  $t_{\text{major}} = 13.1$  min, and  $t_{\text{minor}} = 20.5$  min.);  $^1\text{H}$  NMR ( $\text{CDCl}_3$ , 500 MHz):  $\delta$  (ppm) 3.60 (s, 3H), 4.51 (br, 1H), 4.70 (m, 1H), 5.02 (m, 1H), 5.29 (d,  $J = 11.5$  Hz, 1H), 5.63 (d,  $J = 11.5$  Hz, 1H), 6.18 (d,  $J = 9.0$  Hz, 2H), 6.52 (d,  $J = 9.0$  Hz, 2H), 6.89-8.01 (m, 17H), 8.46 (s, 1H);  $^{13}\text{C}$  NMR ( $\text{CDCl}_3$ , 125 MHz):  $\delta$  (ppm) 55.55, 59.70, 64.37, 83.80, 114.46, 114.69, 122.55, 123.98, 124.98, 125.69, 126.51, 126.81, 128.28, 128.77, 128.88, 128.97, 129.84, 129.86, 130.42, 131.10, 131.18, 133.41, 135.82, 140.27, 142.32, 152.04, 198.42; HRMS (ESI) calcd for  $\text{C}_{37}\text{H}_{30}\text{BrNNaO}_3$  ( $\text{M}+\text{Na}$ ) $^+$  638.1301, found 638.1328.

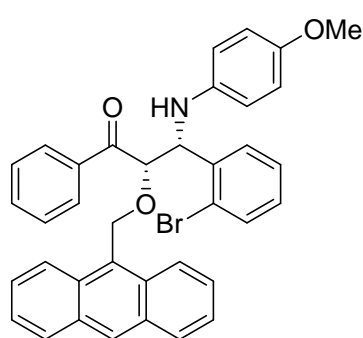

**(4i):** yield 82%; *syn*: 90% ee, determined by HPLC (Daicel Chirapak IA, flow rate 1.0 mL/min, hexane / isopropanol / TFA = 90: 10 :0.1, 254nm, Retention time:  $t_{\text{major}} = 9.7$  min, and  $t_{\text{minor}} = 21.8$  min.), *anti*: 63% ee, determined by HPLC (Daicel Chirapak IA, flow rate 1.0 mL/min, hexane / isopropanol / TFA = 90: 10: 0.1, 254nm, Retention time:  $t_{\text{major}} = 17.2$  min, and  $t_{\text{minor}} = 19.3$  min.);  $^1\text{H}$  NMR ( $\text{CDCl}_3$ , 500 MHz, *syn*):  $\delta$  (ppm) 3.64 (s, 3H), 4.58 (br, 1H), 5.10 (m, 1H), 5.23 (m, 1H), 5.51 (d,  $J = 12.0$  Hz, 1H), 5.69 (d,  $J = 12.0$  Hz, 1H), 6.24 (d,  $J = 9.0$  Hz, 2H), 6.59 (d,  $J = 9.0$  Hz, 2H), 6.86-8.24 (m, 17H), 8.47 (s, 1H),  $^1\text{H}$  NMR ( $\text{CDCl}_3$ , 500 MHz, *anti*):  $\delta$  (ppm) 3.57 (s, 3H), 5.01 (br, 1H), 5.21 (m, 1H), 5.24 (m, 1H), 5.34 (m, 1H), 5.62 (d,  $J = 11.2$  Hz, 1H), 6.14 (d,  $J = 9.0$  Hz, 2H), 6.49 (d,  $J = 9.0$  Hz, 2H), 6.90-8.23 (m, 17H), 8.42 (s, 1H);  $^{13}\text{C}$  NMR ( $\text{CDCl}_3$ , 125 MHz, *syn* & *anti*):  $\delta$  (ppm) 55.49, 55.59, 58.67, 59.64, 63.93, 64.73, 80.11, 80.77, 114.28, 114.55, 114.84, 124.21, 124.27,

124.84, 125.00, 126.31, 126.41, 127.40, 128.22, 128.32, 128.59, 128.72, 128.88, 128.95, 131.21, 131.30, 132.52, 133.20, 136.17, 140.28, 152.17, 198.80; HRMS (ESI) calcd for  $C_{37}H_{30}BrNNaO_3$  ( $M+Na$ )<sup>+</sup> 638.1301, found 638.1329.

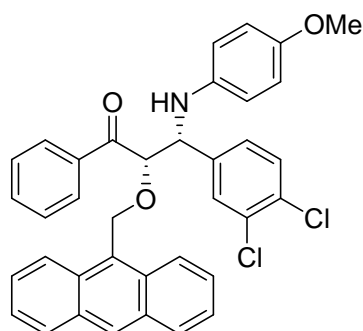

**(4k):** yield 71%;  $[\alpha]_D^{20} = -17.4^\circ$  ( $c = 1$ ,  $CH_2Cl_2$ ); 93% ee, determined by HPLC (Daicel Chirapak IA, flow rate 1.0 mL/min, hexane/isopropanol/TFA = 90: 10: 0.1, 254nm, Retention time:  $t_{major} = 11.5$  min, and  $t_{minor} = 27.3$  min.);  $^1H$  NMR ( $CDCl_3$ , 500 MHz):  $\delta$  (ppm) 3.60 (s, 3H), 4.03 (br, 1H), 4.57 (m, 1H), 4.91 (m, 1H), 5.39 (d,  $J = 12.5$  Hz, 1H), 5.68 (d,  $J = 12.5$  Hz, 1H), 5.97 (d,  $J = 9.0$  Hz, 2H), 6.49 (d,  $J = 9.0$  Hz, 2H), 6.87-8.13 (m, 16H), 8.51 (s, 1H);  $^{13}C$  NMR ( $CDCl_3$ , 125 MHz):  $\delta$  (ppm) 55.57, 59.56, 64.12, 83.59, 114.57, 114.84, 123.78, 125.16, 126.71, 126.95, 127.01, 128.54, 128.84, 129.14, 129.21, 129.68, 130.10, 131.13, 131.33, 131.57, 132.22, 133.73, 135.66, 138.97, 139.31, 152.31, 198.83; HRMS (ESI) calcd for  $C_{37}H_{29}Cl_2NNaO_3$  ( $M+Na$ )<sup>+</sup> 628.1417, found 628.1450.

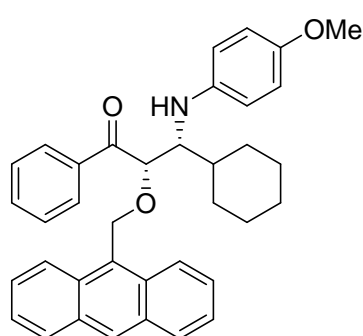

**(4l):** yield 68%;  $[\alpha]_D^{20} = -11.0^\circ$  ( $c = 1$ ,  $CH_2Cl_2$ ); 93% ee, determined by HPLC (Daicel Chirapak AD-H, flow rate 1.0 mL/min, hexane/isopropanol/EtOH = 450: 25: 25, 254nm, Retention time:  $t_{major} = 6.8$  min, and  $t_{minor} = 20.8$  min.);  $^1H$  NMR ( $CDCl_3$ , 500 MHz):  $\delta$  (ppm) 0.55-1.76 (m, 11H), 3.26 (br, 1H), 3.65 (s, 3H), 3.79 (m, 1H), 4.99 (m, 1H), 5.55 (d,  $J = 12.0$  Hz, 1H), 5.82 (d,  $J = 12.0$  Hz, 1H), 6.09 (d,  $J = 9.0$  Hz, 2H), 6.47 (d,  $J = 9.0$  Hz, 2H), 7.30-8.41 (m, 13H), 8.52 (s, 1H);  $^{13}C$  NMR ( $CDCl_3$ , 125 MHz):  $\delta$  (ppm) 25.50, 26.10, 26.14, 30.10, 30.45, 40.97, 55.72, 61.89, 63.29, 79.16, 114.17, 114.43, 124.43, 125.10, 126.45, 127.95, 128.48, 128.72, 129.01, 131.35, 131.51, 132.67, 136.58, 142.67, 151.32, 200.72; HRMS (ESI) calcd for  $C_{37}H_{37}NNaO_3$  ( $M+Na$ )<sup>+</sup> 566.2666, found 566.2693.

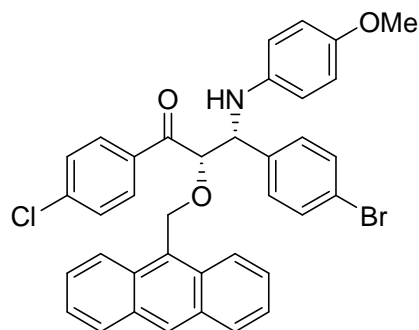

**(4m):** yield 67%; 94% ee, determined by HPLC (Daicel Chirapak IA, flow rate 1.0 mL/min, hexane/isopropanol/TFA = 90: 10: 0.1, 254nm, Retention time:  $t_{major} = 12.9$  min, and  $t_{minor} = 25.6$  min.);  $^1H$  NMR ( $CDCl_3$ , 500 MHz):  $\delta$  (ppm) 3.61 (s, 3H), 4.48 (br, 1H), 4.65 (m, 1H), 4.85 (m, 1H), 5.32 (d,  $J = 11.5$  Hz, 1H), 5.62 (d,  $J = 11.5$  Hz, 1H), 6.19 (d,  $J = 9.0$  Hz, 2H), 6.53 (d,  $J = 9.0$  Hz, 2H), 6.92 (d,  $J = 8.5$  Hz, 2H), 7.14 (d,  $J = 8.5$  Hz, 2H), 7.35-8.01 (m, 12H), 8.47 (s, 1H);  $^{13}C$  NMR ( $CDCl_3$ , 125 MHz):  $\delta$  (ppm) 55.59, 59.78, 64.46, 84.29, 114.56, 114.88, 121.26, 123.90, 125.06, 126.51, 126.60, 128.58, 128.98, 129.04, 129.80, 131.08, 131.21, 131.42, 134.14, 138.52, 139.83, 140.22, 152.26,

197.72; HRMS (ESI) calcd for  $C_{37}H_{29}BrClNNaO_3$  ( $M+K$ )<sup>+</sup> 672.0912, found 672.0895.

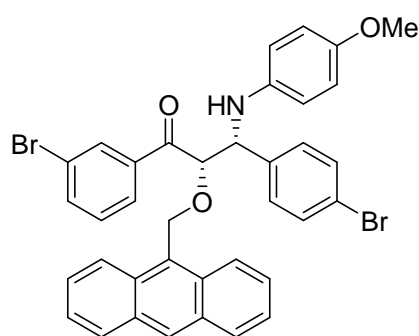

**(4n)**: yield 77%; 92% ee, determined by HPLC (Daicel Chirapak IA, flow rate 1.0 mL/min, hexane/isopropanol/EtOH/TFA = 500: 20: 20: 1, 254nm, Retention time:  $t_{major}$  = 18.3 min, and  $t_{minor}$  = 40.0 min.); <sup>1</sup>H NMR (CDCl<sub>3</sub>, 400 MHz):  $\delta$  (ppm) 3.61 (s, 3H), 4.46 (br, 1H), 4.65 (m, 1H), 4.85 (m, 1H), 5.32 (d,  $J$  = 12.0 Hz, 1H), 5.63 (d,  $J$  = 12.0 Hz, 1H), 6.20 (d,  $J$  = 8.8 Hz, 2H), 6.53 (d,  $J$  = 8.8 Hz, 2H), 6.92 (d,  $J$  = 8.4 Hz, 2H), 7.14 (d,  $J$  = 8.4 Hz, 2H), 7.24-8.01 (m, 12H), 8.47 (s, 1H); <sup>13</sup>C NMR (CDCl<sub>3</sub>, 125 MHz):  $\delta$  (ppm) 55.60, 59.75, 64.54, 84.24, 114.57, 114.98, 121.31, 123.07, 123.87, 125.08, 126.59, 126.73, 128.62, 128.99, 129.08, 130.18, 131.09, 131.21, 131.42, 131.45, 136.12, 137.58, 138.45, 140.18, 152.32, 197.63; HRMS (ESI) calcd for  $C_{37}H_{29}Br_2NNaO_3$  ( $M+Na$ )<sup>+</sup> 716.0406, found 716.0351.

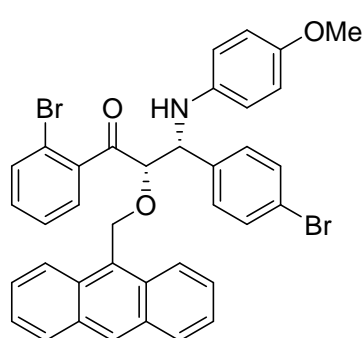

**(4o)**: yield 74%; 87% ee, determined by HPLC (Daicel Chirapak AD-H, flow rate 1.0 mL/min, hexane/isopropanol/EtOH = 450: 25: 25, 254nm, Retention time:  $t_{major}$  = 15.8 min, and  $t_{minor}$  = 37.6 min.); <sup>1</sup>H NMR (CDCl<sub>3</sub>, 500 MHz):  $\delta$  (ppm) 3.68 (s, 3H), 4.03 (br, 1H), 4.70 (m, 1H), 5.06 (m, 1H), 5.46 (d,  $J$  = 12.0 Hz, 1H), 5.67 (d,  $J$  = 12.0 Hz, 1H), 6.11 (d,  $J$  = 8.5 Hz, 2H), 6.58 (d,  $J$  = 8.5 Hz, 2H), 6.80-8.19 (m, 16H), 8.53 (s, 1H); <sup>13</sup>C NMR (CDCl<sub>3</sub>, 125 MHz):  $\delta$  (ppm) 57.01, 60.66, 66.46, 86.67, 116.02, 116.48, 120.07, 121.06, 123.09, 125.42, 126.53, 128.09, 128.43, 128.64, 130.51, 130.60, 130.68, 131.35, 132.57, 132.78, 133.42, 135.47, 138.72, 140.10, 140.89, 153.78, 203.55; HRMS (ESI) calcd for  $C_{37}H_{29}Br_2NNaO_3$  ( $M+Na$ )<sup>+</sup> 716.0406, found 716.0422.

**Control experiment of 6 with 3b was carried out in the strand conditions.**

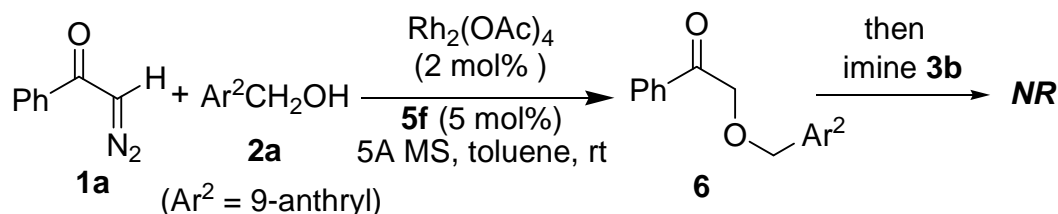



### Deprotection of the product **4b**:<sup>4</sup>

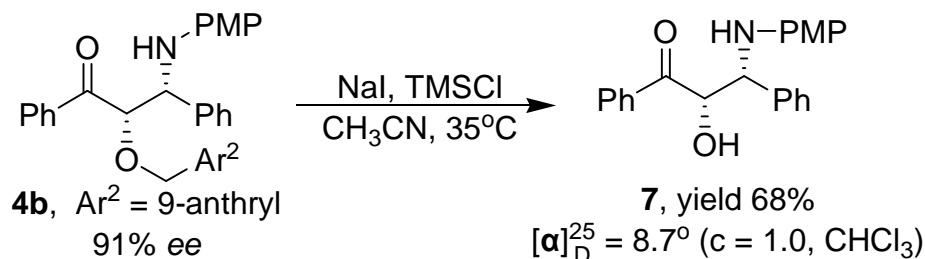

To a solution of compound **4b** (0.1 mmol) and NaI (30mg, 2eq) in 1.0 mL of CH<sub>3</sub>CN was added 30 μL TMSCl (2 ~ 2.5eq) via a syringe pump at room temperature under an argon atmosphere. The reaction temperature was warmed to 30 °C and stirred over night. The reaction mixture was poured into water and stirred for 10 min. The aqueous phase was extracted with EtOAc. The organic phase was separated, washed with saturated aqueous Na<sub>2</sub>S<sub>2</sub>O<sub>3</sub>, and dried over anhydrous MgSO<sub>4</sub>. After evaporating the solvents, the crude product was purified by flash chromatography on silica gel (eluent: EtOAc/light petroleum ether = 1:50~1:30) to give compound **7** in 68% yield. After recrystallization from CH<sub>2</sub>Cl<sub>2</sub>, EtOAc and light petroleum ether, give the optical pure product in 47% yield. [α]<sub>D</sub><sup>25</sup> = 8.7° (c = 1.0, CHCl<sub>3</sub>); 99% ee, determined by HPLC (Daicel Chirapak OD, flow rate 0.9 mL/min, hexane/isopropanol = 90:10, 254nm, Retention time: t<sub>minor</sub> = 17.8 min, and t<sub>major</sub> = 20.5 min.); <sup>1</sup>H NMR (CDCl<sub>3</sub>, 500 MHz): δ (ppm) 3.68 (s, 3H), 4.86 (d, *J* = 2.7 Hz, 1H), 5.59 (d, *J* = 2.7 Hz, 1H), 6.55 (d, *J* = 9.0 Hz, 2H), 6.69 (d, *J* = 9.0 Hz, 2H), 6.92-7.18 (m, 5H), 7.53-7.90 (m, 5H); HRMS (ESI) calcd for C<sub>22</sub>H<sub>21</sub>NNaO<sub>3</sub> (M+Na)<sup>+</sup> 370.1419, found 370.1408. Reference Data:<sup>4</sup> [α]<sub>D</sub><sup>25</sup> = -9.58° (c = 0.748, CHCl<sub>3</sub>, 99% ee); syn diastereomer: t<sub>major</sub> = 18.1 min, and t<sub>minor</sub> = 20.9 min, (Chiralcel OD, 254 nm, heptane/*i*-PrOH = 90:10, 0.9 mL/min); <sup>1</sup>H NMR (CDCl<sub>3</sub>, 300 MHz): δ (ppm) 3.66 (s, 3 H), 4.82 (dd, *J* = 1.9, 6.8 Hz, 1 H), 5.58 (br s, 1 H), 6.54 (d, *J* = 8.8 Hz, 2 H), 6.66 (d, *J* = 8.8 Hz, 2 H), 7.14 (m, 2 H), 6.90 (m, 2 H), 7.52 (t, *J* = 7.8 Hz, 3 H), 7.88 (m, 3 H).

### Oxidation of the product **4b**:<sup>5</sup>

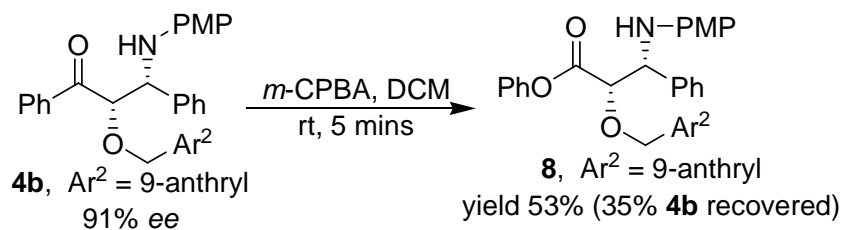

To a solution of compound **4b** (0.19 mmol) in 2.0 mL of CH<sub>2</sub>Cl<sub>2</sub> was added NaH<sub>2</sub>PO<sub>4</sub> · 2H<sub>2</sub>O (106 mg, 0.76 mmol), and *m*-CPBA (98 mg, 0.57 mmol) was added in portions at room temperature. About 5 min later, the reaction mixture was quenched by aqueous Na<sub>2</sub>S<sub>2</sub>O<sub>3</sub>, and extracted with ether, washed with cold aqueous NaHCO<sub>3</sub> and aqueous NaCl in sequence. Then the organic phase was dried over

anhydrous MgSO<sub>4</sub>. After evaporating the solvents, the crude product was purified by flash chromatography on silica gel (eluent: EtOAc/light petroleum ether = 1:80~1:50) to give compound **8** in 53% yield (with 35% of the material recovered). <sup>1</sup>H NMR (CDCl<sub>3</sub>, 500 MHz): δ (ppm) 3.63 (s, 3H), 4.85 (d, *J* = 3.2 Hz, 1H), 5.10 (d, *J* = 3.2 Hz, 1H), 5.12 (d, *J* = 10.8 Hz, 2H), 5.46 (d, *J* = 10.8 Hz, 2H), 6.19 -6.97 (m, 4H), 7.19 -8.03 (m, 18H), 8.39 (s, 1H); HRMS (ESI) calcd for C<sub>37</sub>H<sub>31</sub>NaO<sub>4</sub> (M+Na)<sup>+</sup> 576.2151, found 576.2137.

## References:

- 1 a) M. P. Doyle, M. A. McKervey, T. Ye, in *Modern Catalytic Methods for Organic Synthesis with Diazo Compounds*, John Wiley & Sons, New York, **1998**, pp. 1-46.
- 2 a) M. Shiino, Y. Watanabe, Umezawa, K. *Bioorg. Med. Chem.* **2001**, *9*, 1233-1240; b) W. Hu, X. Xu, J. Zhou, W. Liu, H. Huang, J. Hu, L. Yang, L. Gong, *J. Am. Chem. Soc.* **2008**, *130*, 7782-7783.
- 3 a) D. Uraguchi, M. Terada, *J. Am. Chem. Soc.* **2004**, *126*, 5356-5357; b) T. Akiyama, H. Morita, J. Itoh, K. Fuchibe, *Org. Lett.* **2005**, *7*, 2583-2585; c) R. I. Storer, D. E. Carrera, Y. Ni, D. W. C. MacMillan, *J. Am. Chem. Soc.* **2006**, *128*, 84-86; d) D. Uraguchi, K. Sorimachi, M. Terada, *Angew. Chem.* **2006**, *118*, 2312-2315; *Angew. Chem. Int. Ed.* **2006**, *45*, 2254-2257; (e) M. Yamanaka, I. Junji, K. Fuchibe, T. Akiyama, *J. Am. Chem. Soc.* **2007**, *129*, 6756-6764; (f) Q. Guo, H. Liu, C. Guo, S. Luo, Y. Gu, L. Gong, *J. Am. Chem. Soc.* **2007**, *129*, 3790-3791; (g) J. Jiang, J. Yu, X. Sun, Q. Rao, L. Gong, *Angew. Chem.* **2008**, *120*, 2492-2496; *Angew. Chem. Int. Ed.* **2008**, *47*, 2458-2462; h) T. Masahiro, U. Daisuke, S. Keiichi, S. Hideo, *PCT Int. Appl.* **2005**, WO2005070875.
- 4 a) A. O. George, C. N. Subhash, G. B.G. Balaram, M. Ripudaman, *J. Org. Chem.* **1979**, *44*, 1247-1271; b) E. J. Michael, A. L. Mark, *J. Org. Chem.* **1977**, *42*, 3761-3764; c) B. M. Trost, L. R. Terrell, *J. Am. Chem. Soc.* **2003**, *125*, 338-339.
- 5 a) S. Matsunaga, T. Yoshida, H. Morimoto, N. Kumagai, M. Shibasaki, *J. Am. Chem. Soc.* **2004**, *126*, 8777-8785; b) M. B. Andrus, E. J. Hicken, J. C. Stephens, D. K. Bedke, *J. Org. Chem.* **2005**, *70*, 9470-9479.

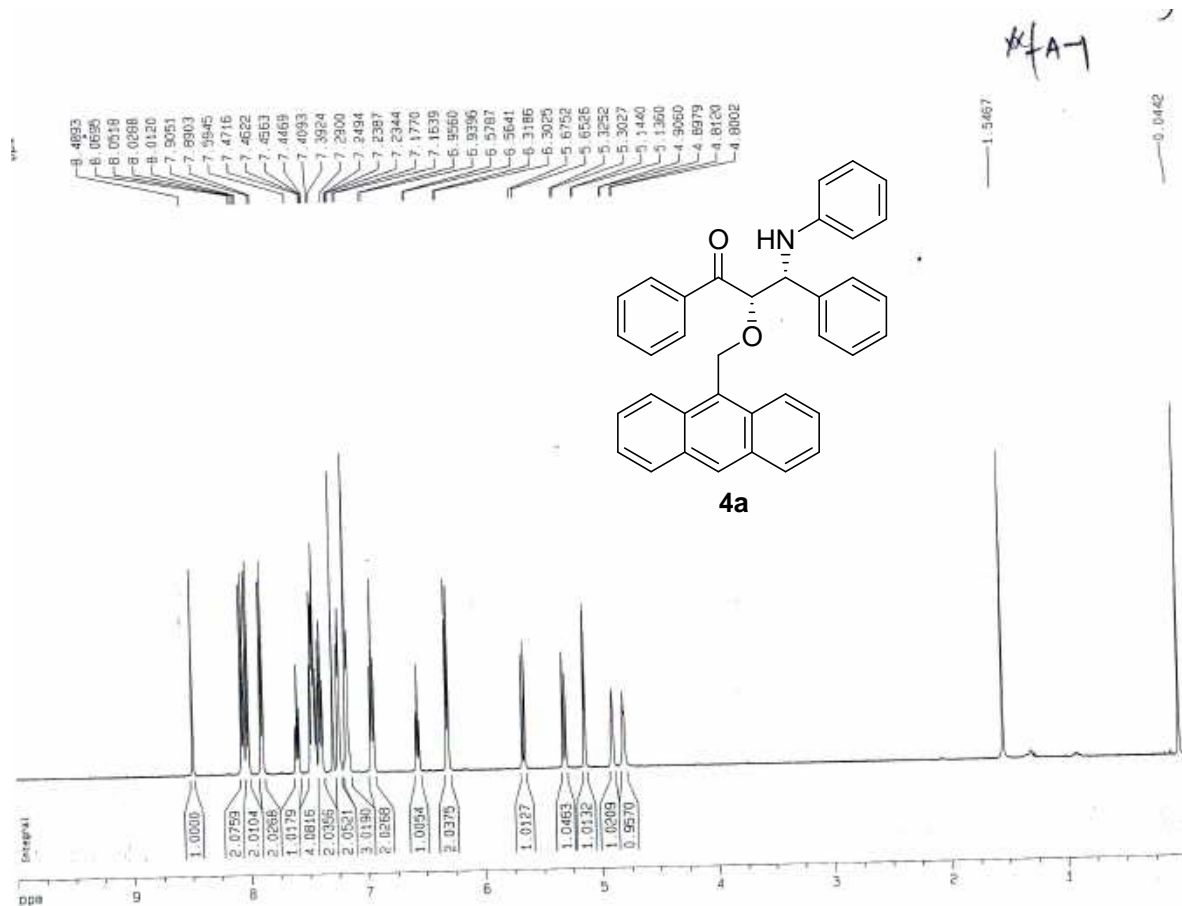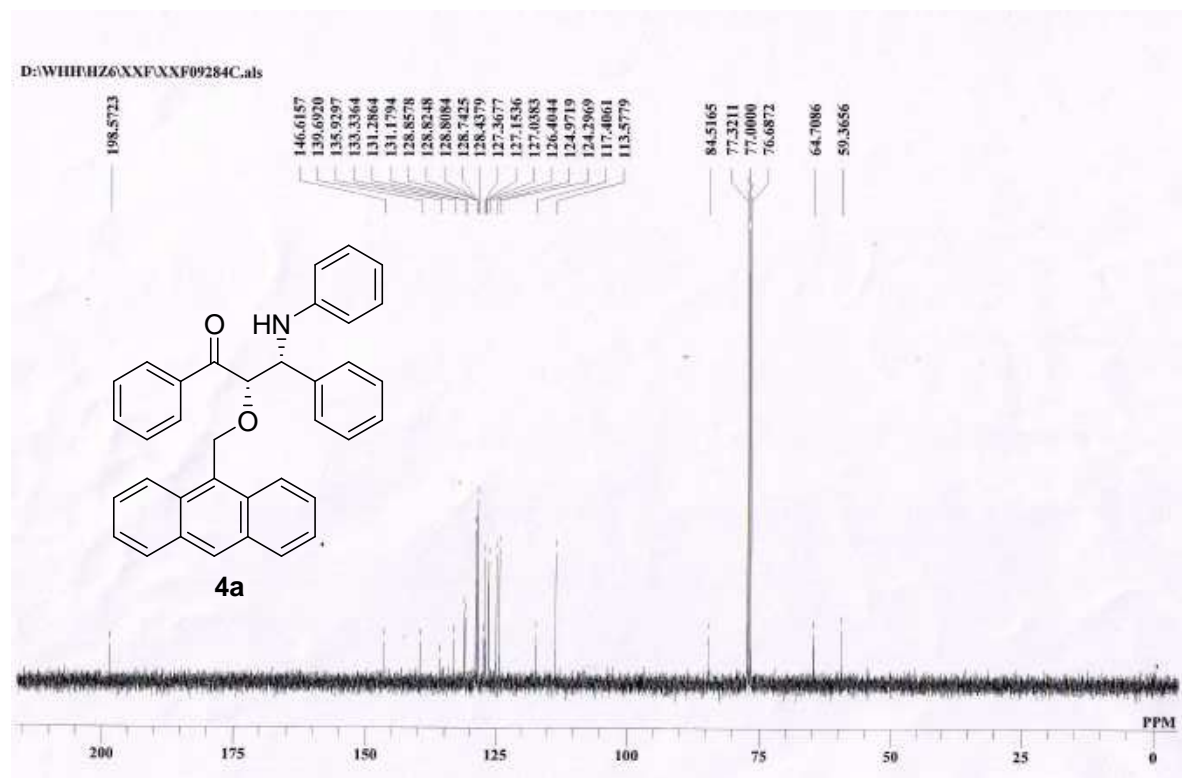

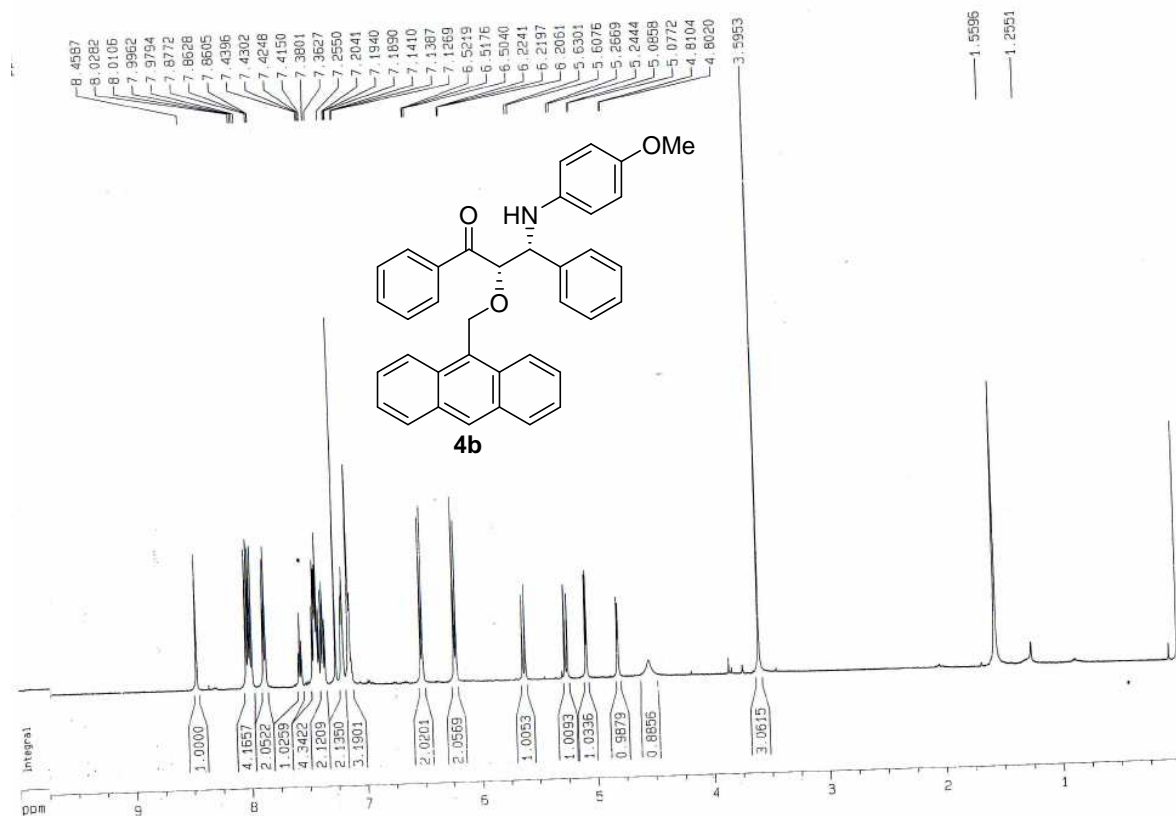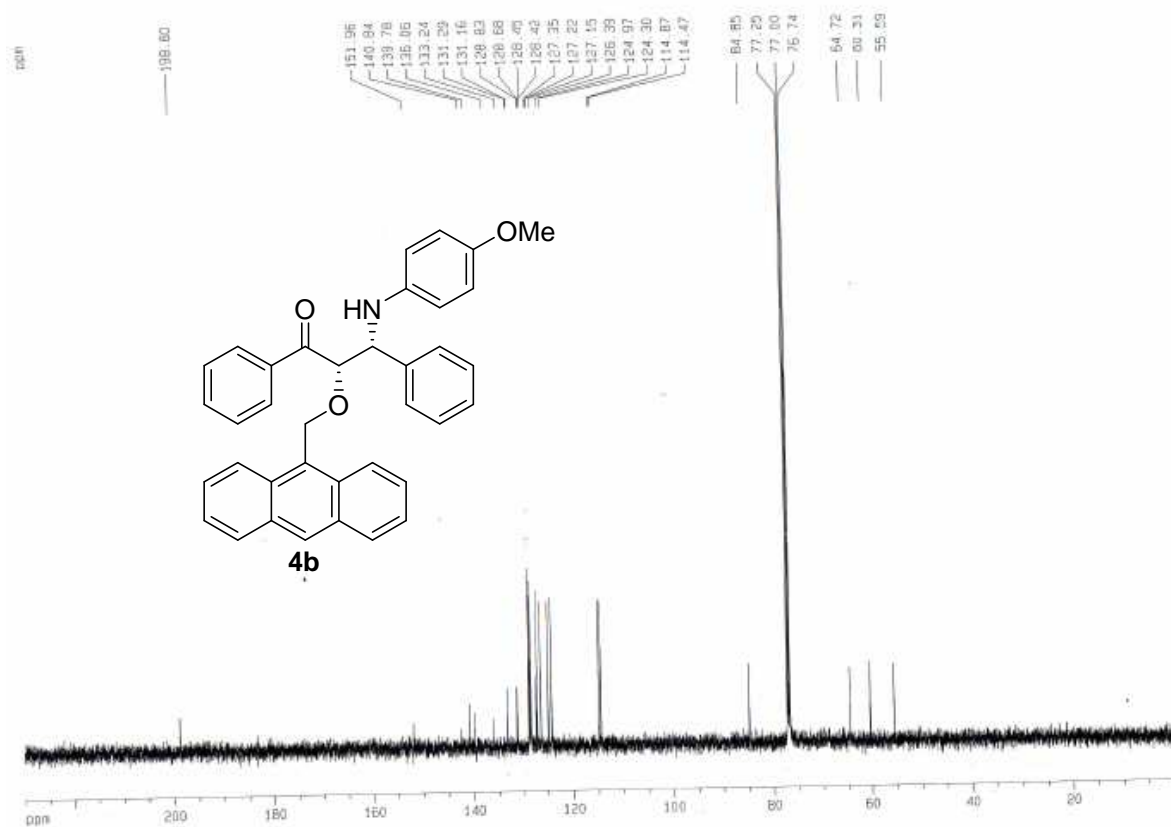

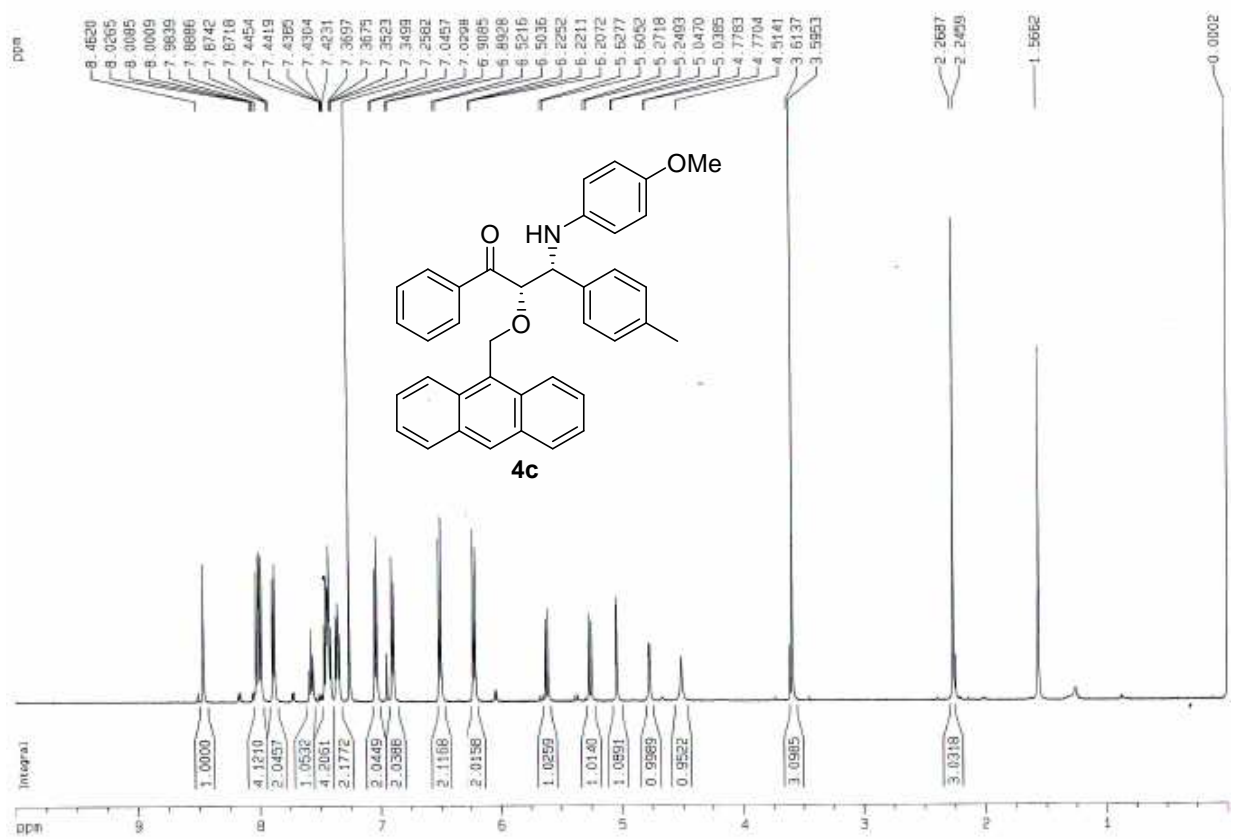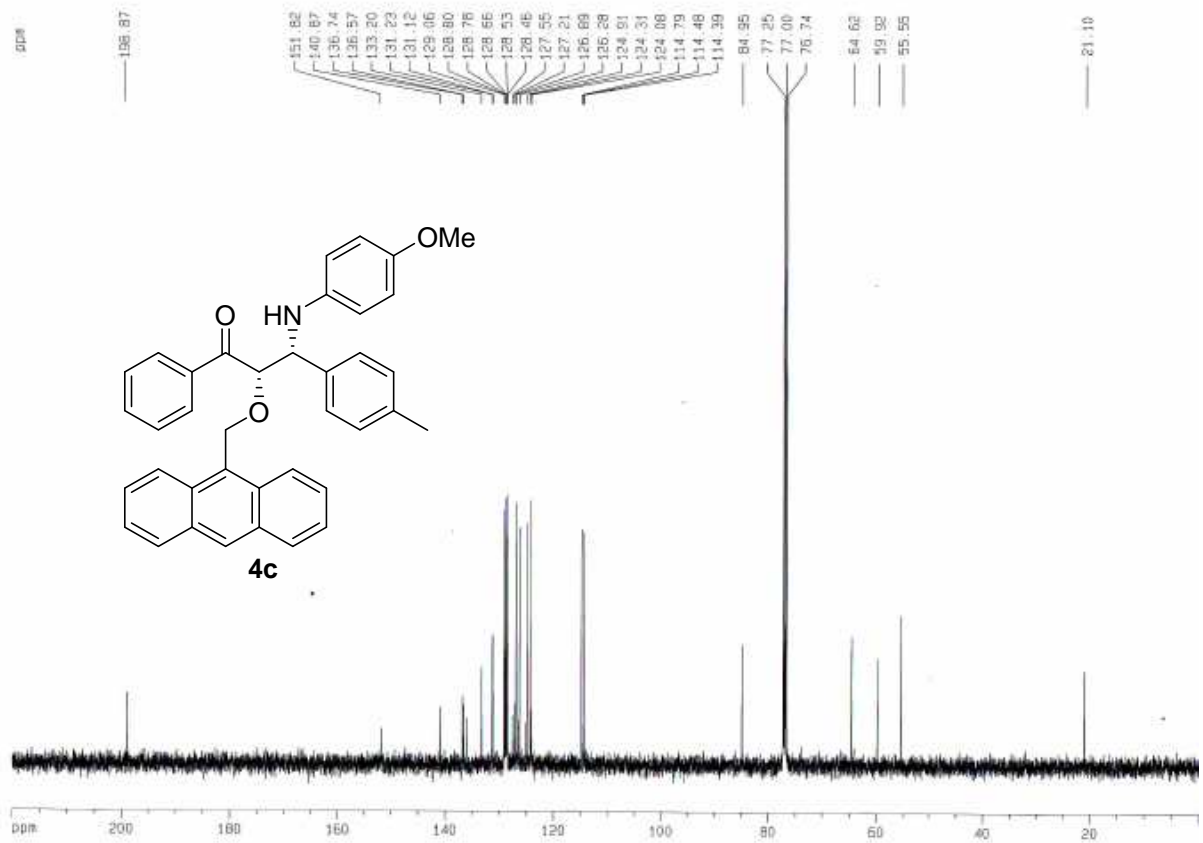

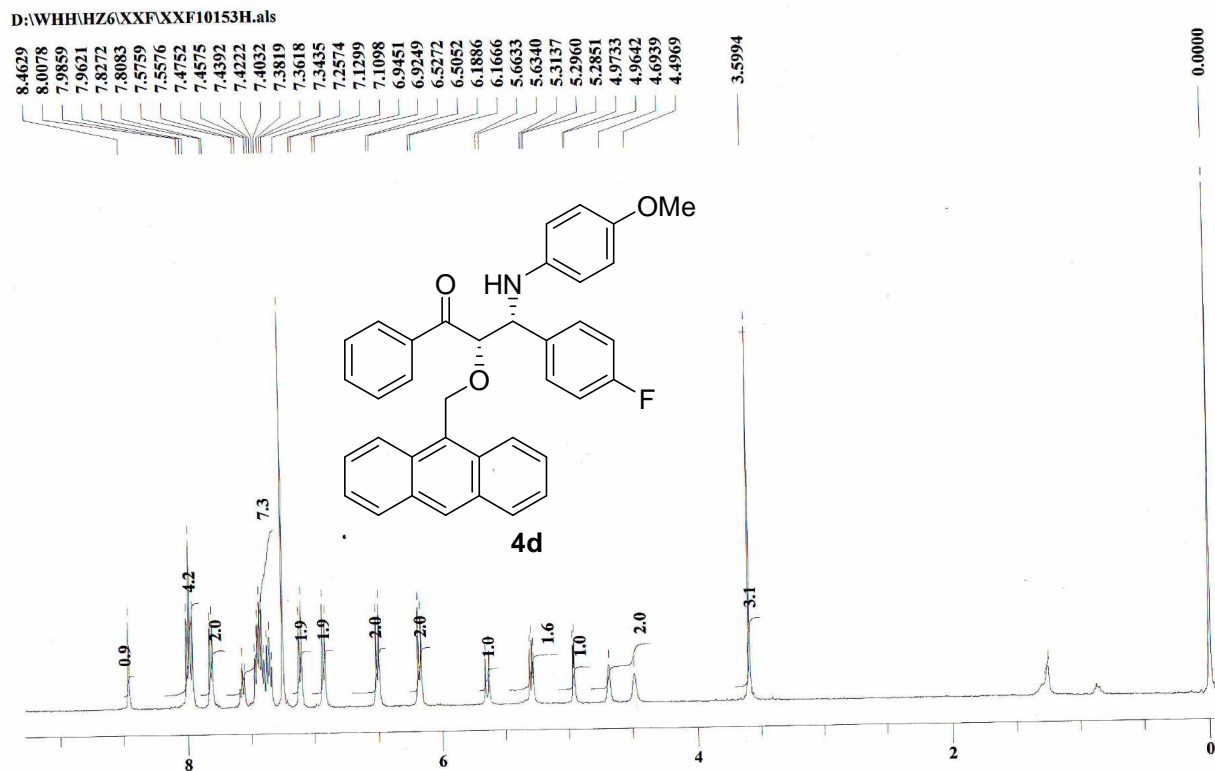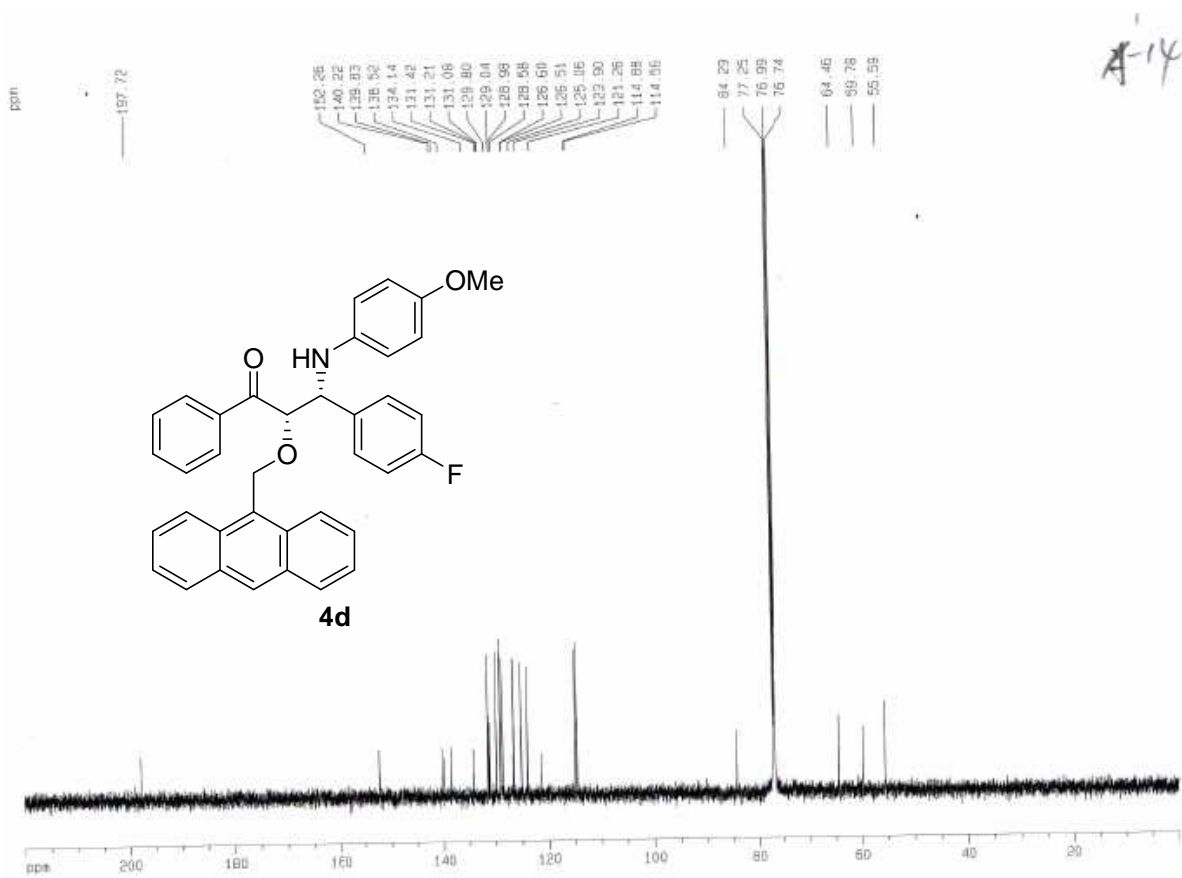

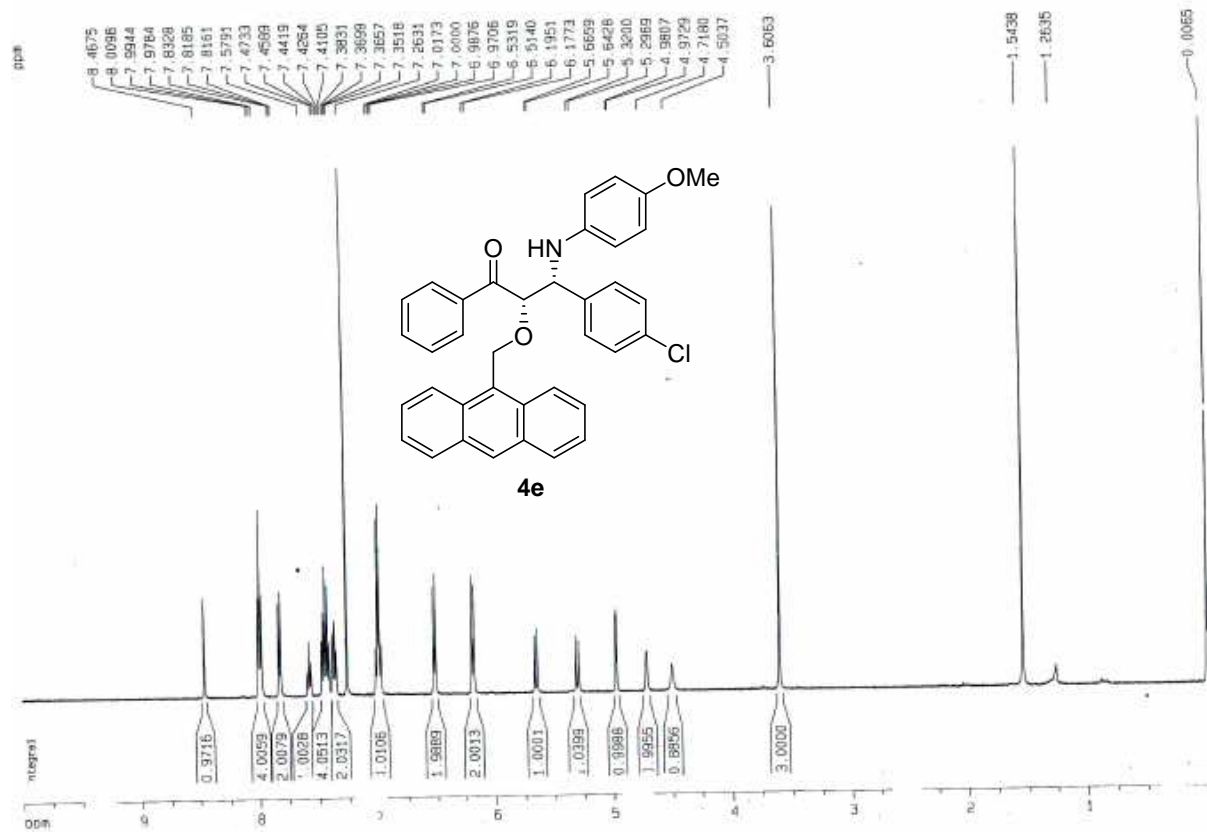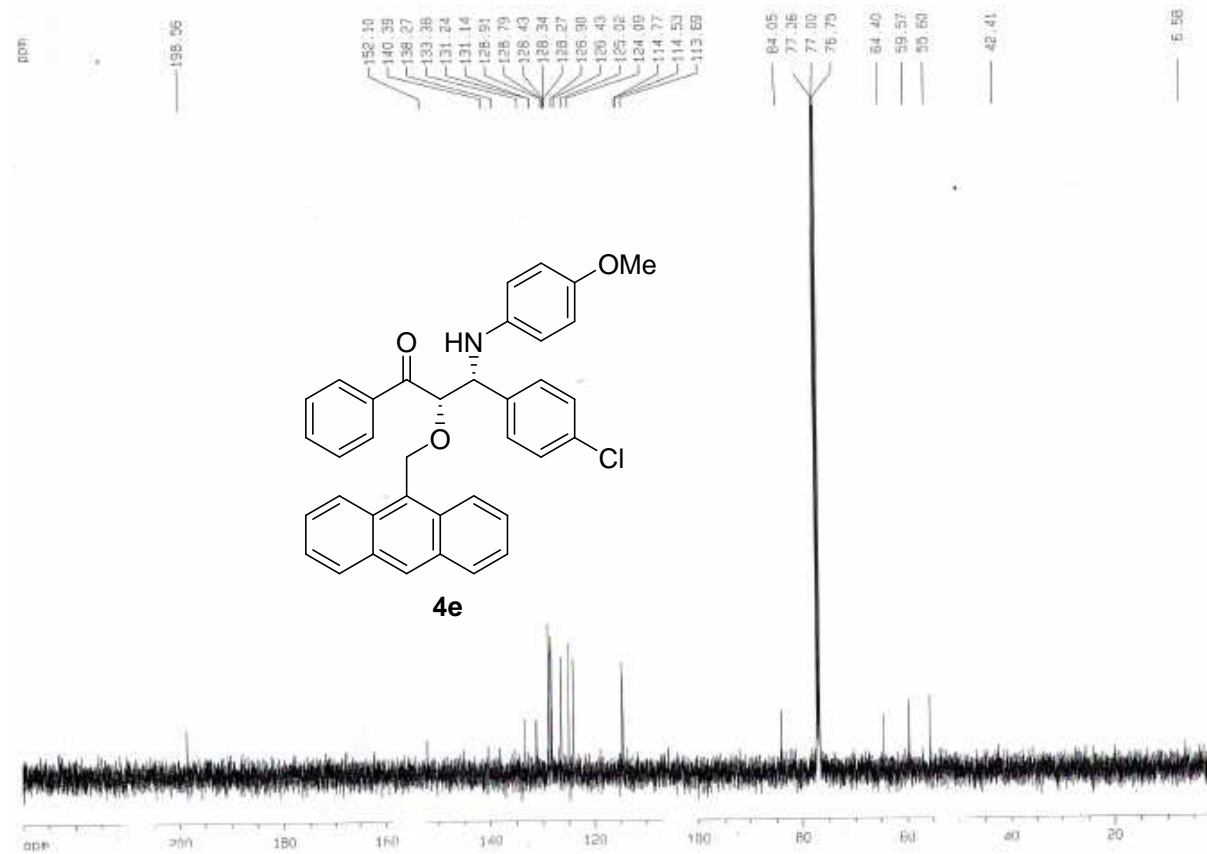

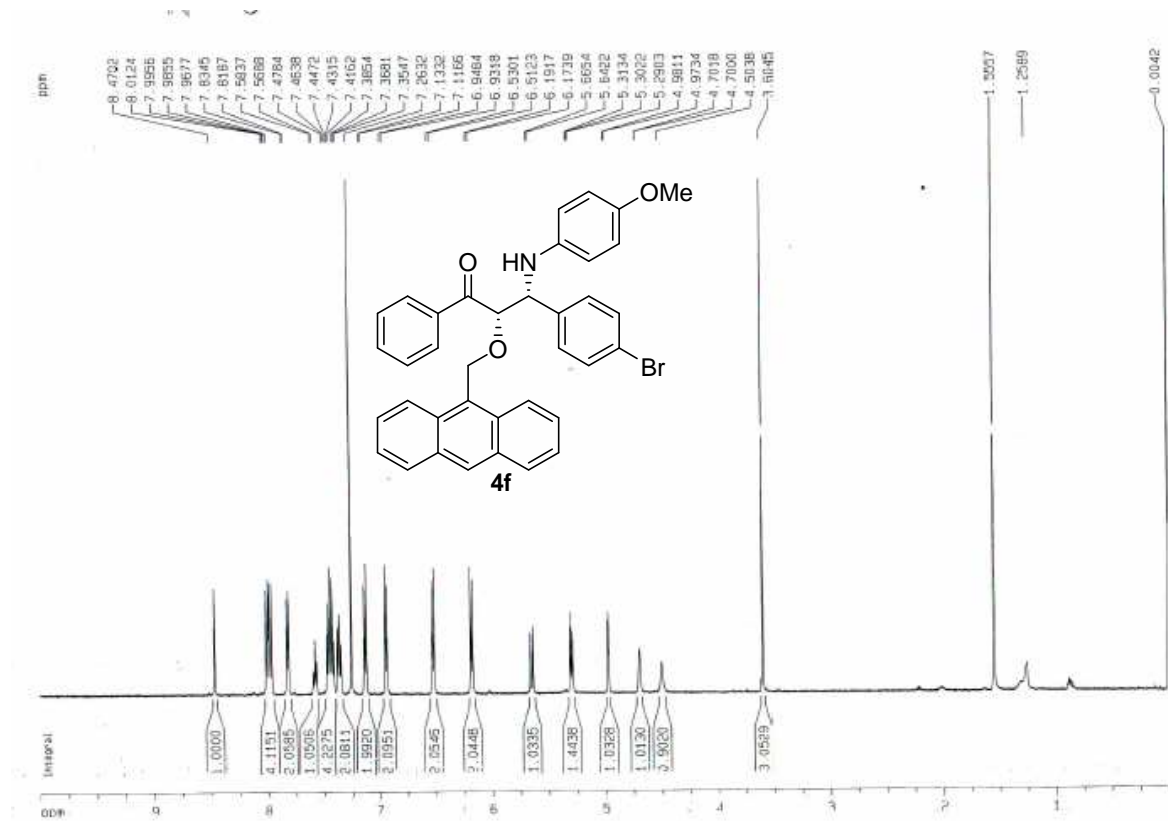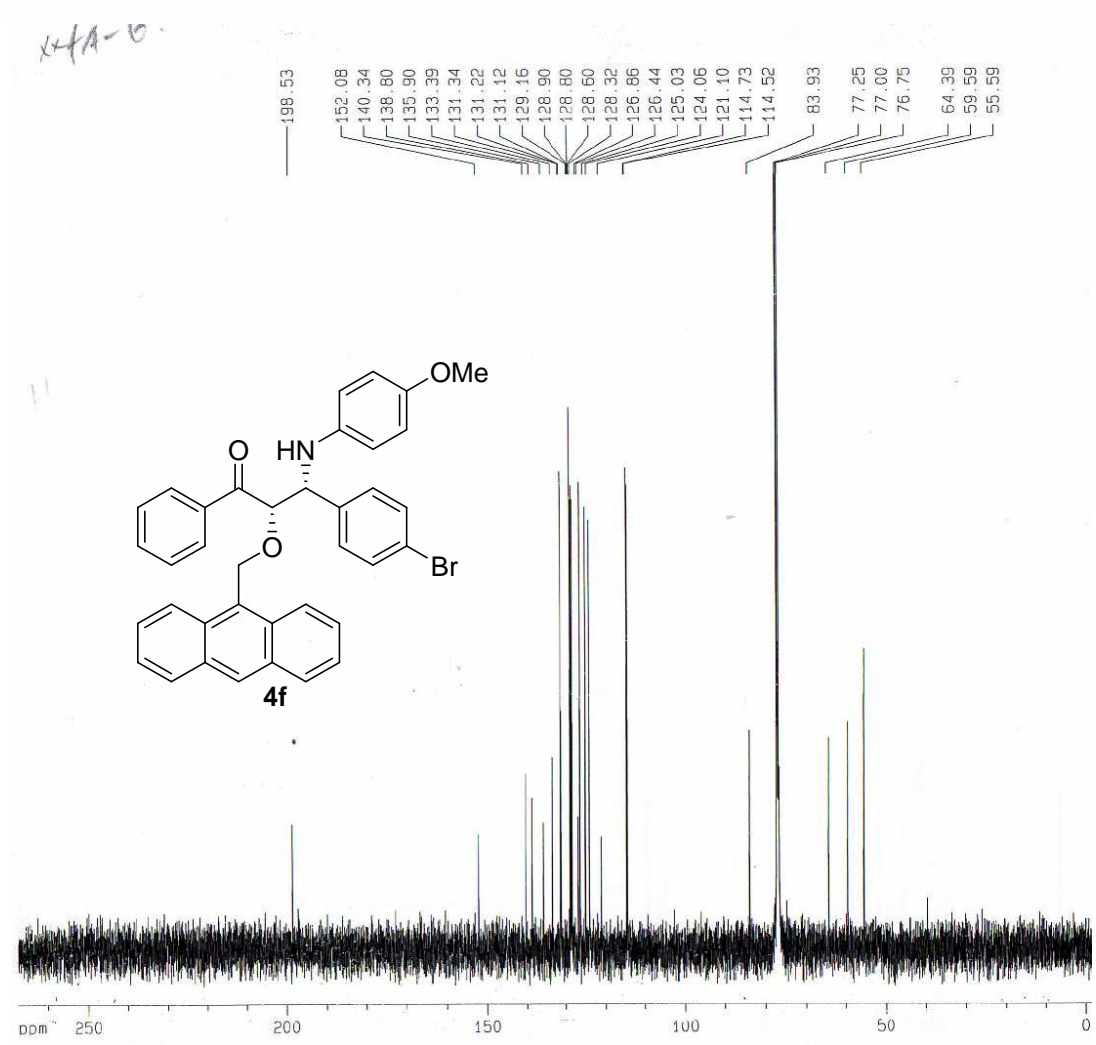



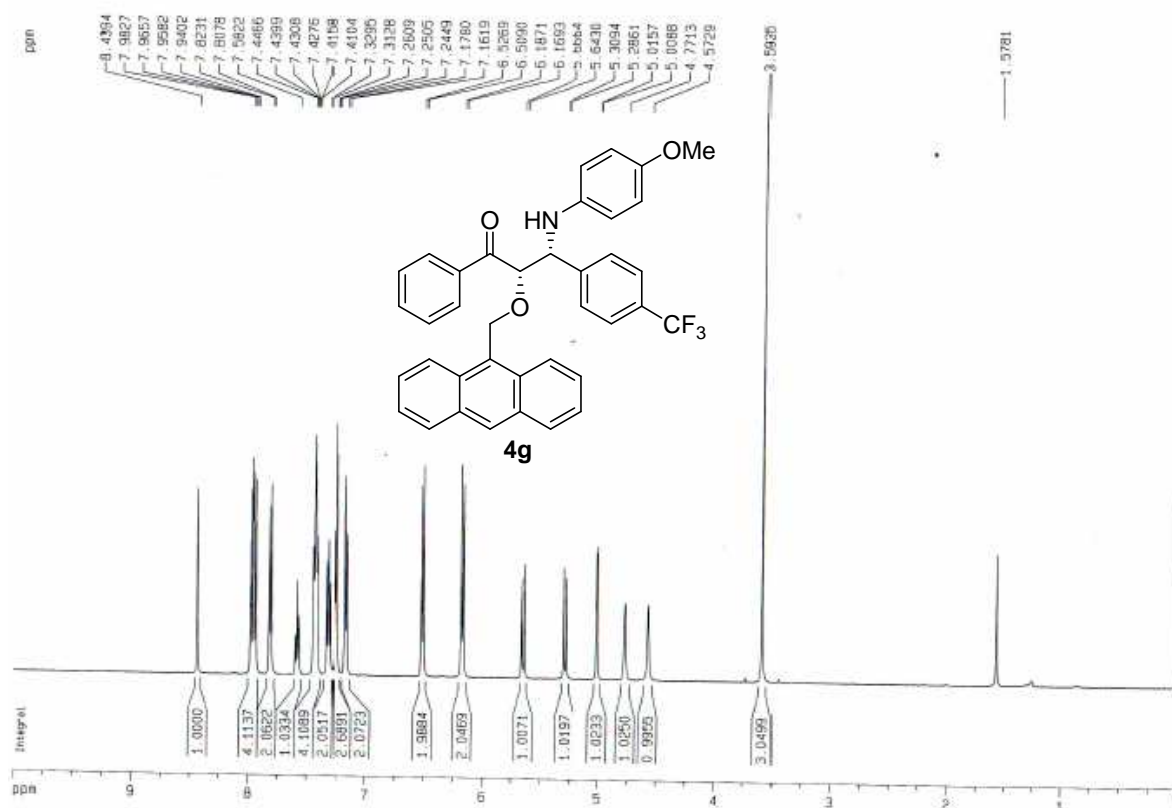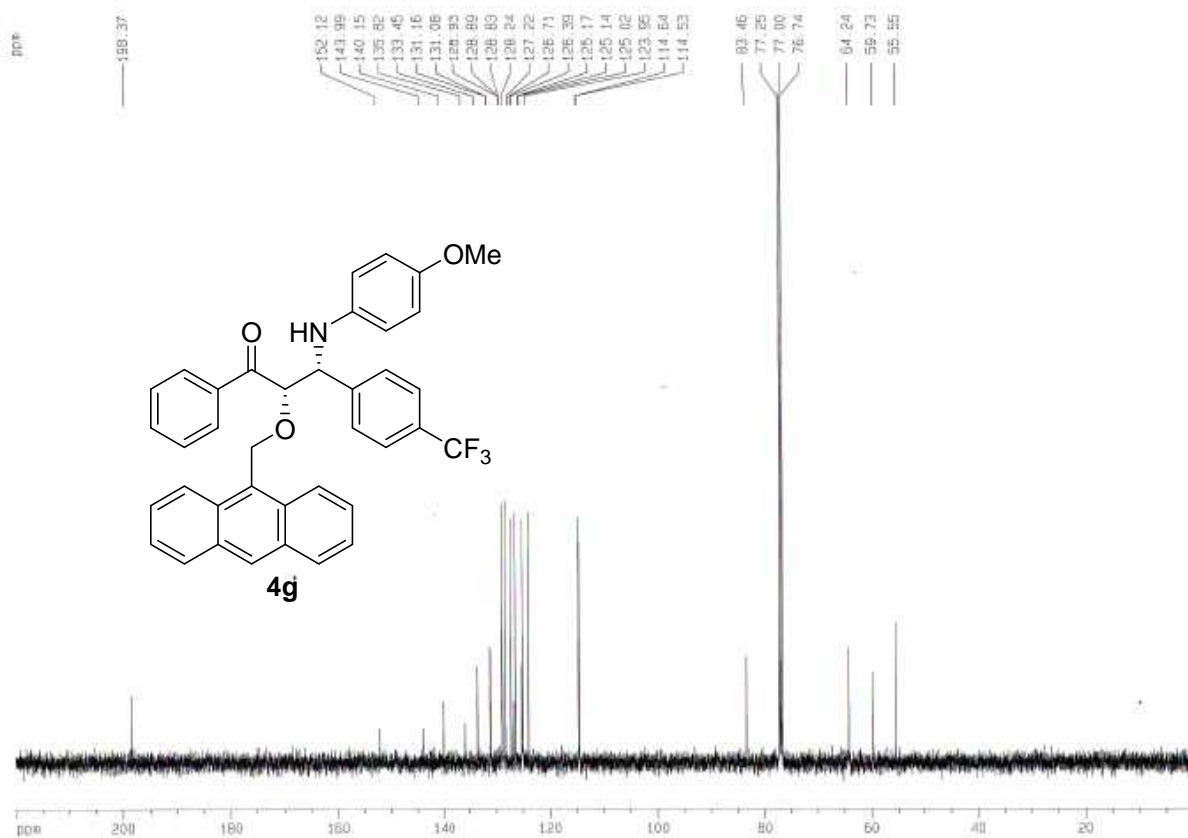

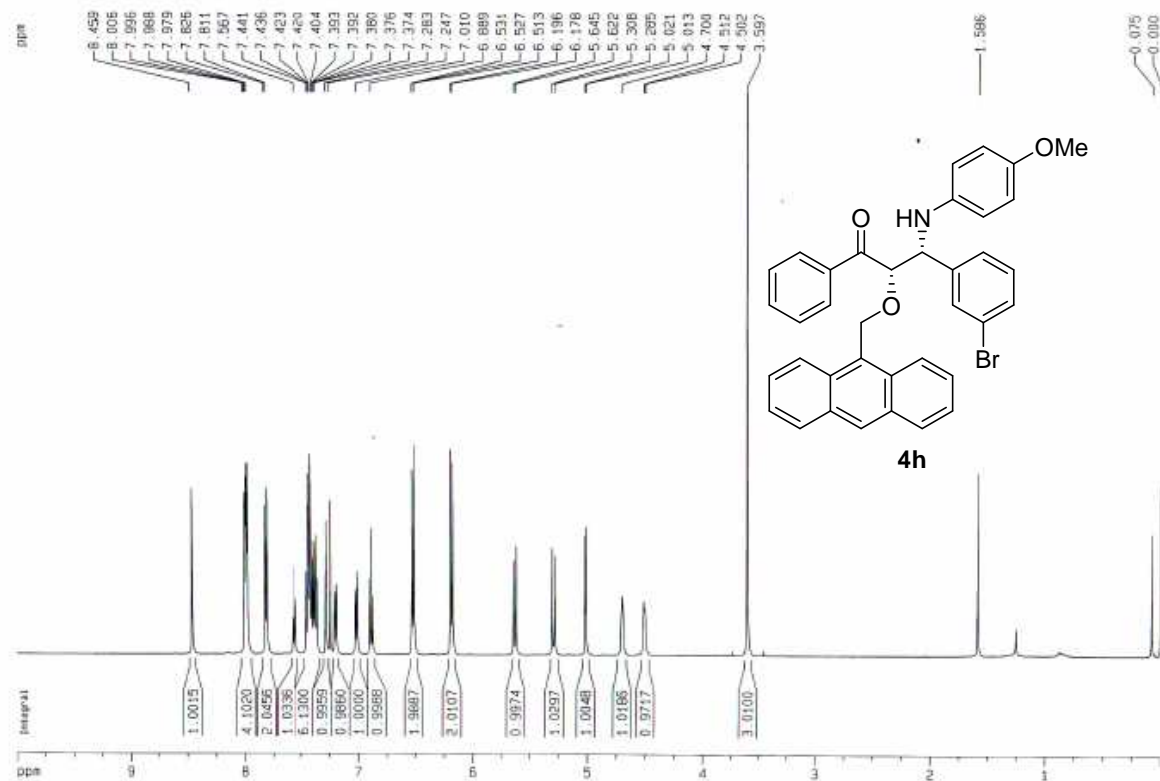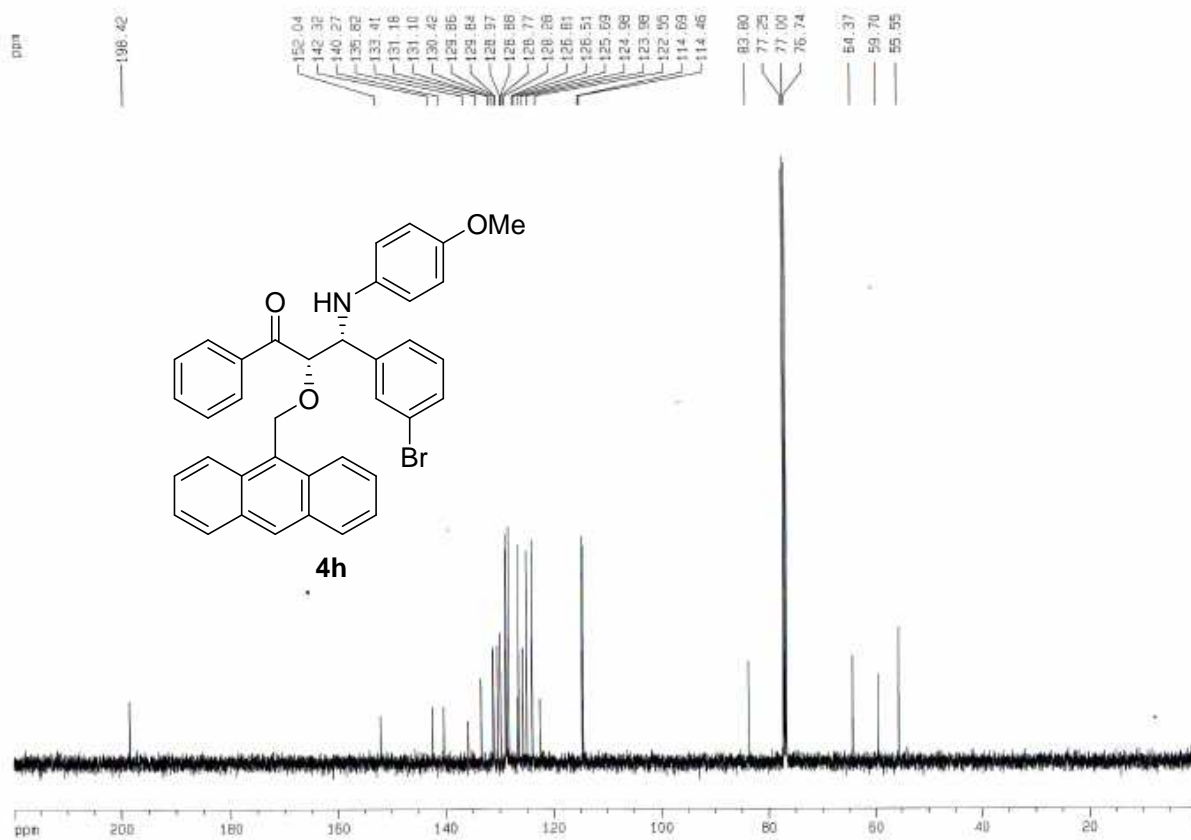

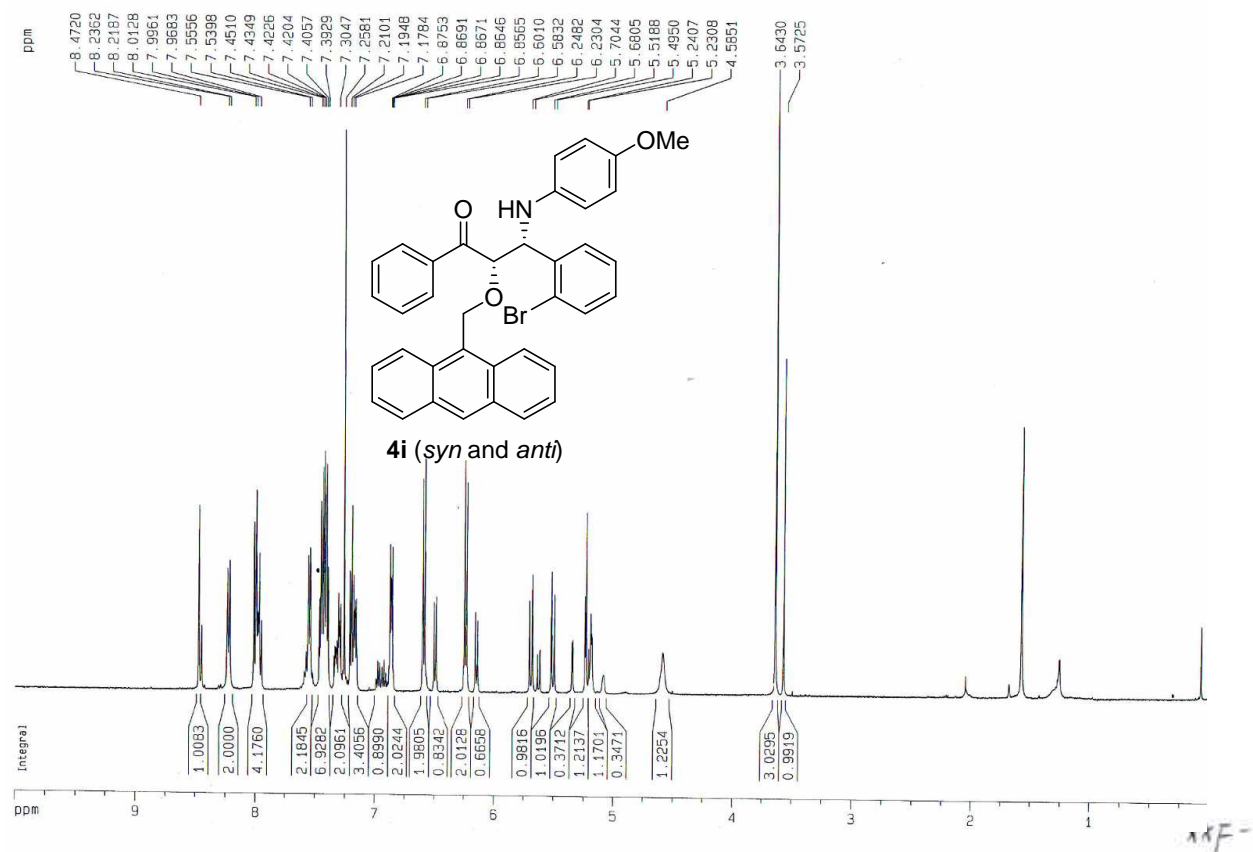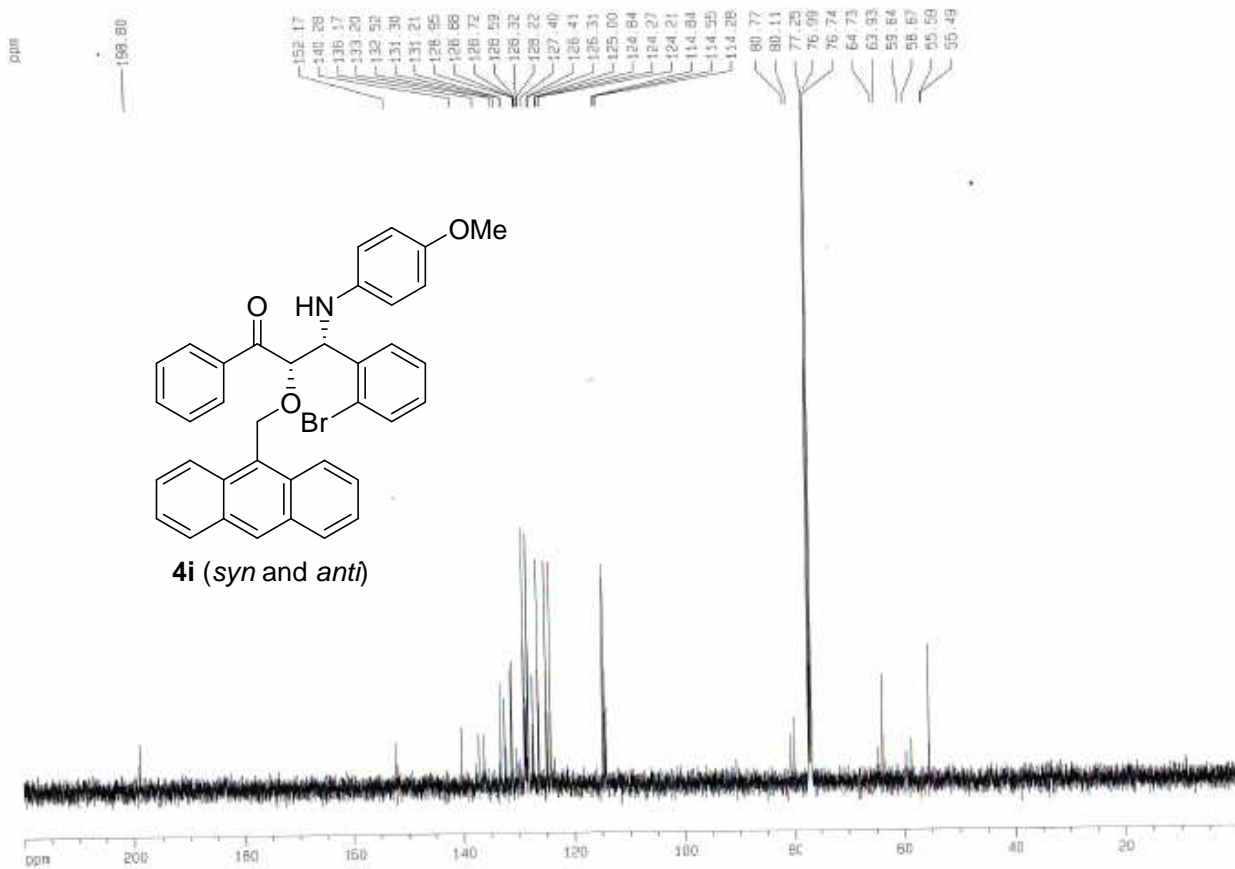

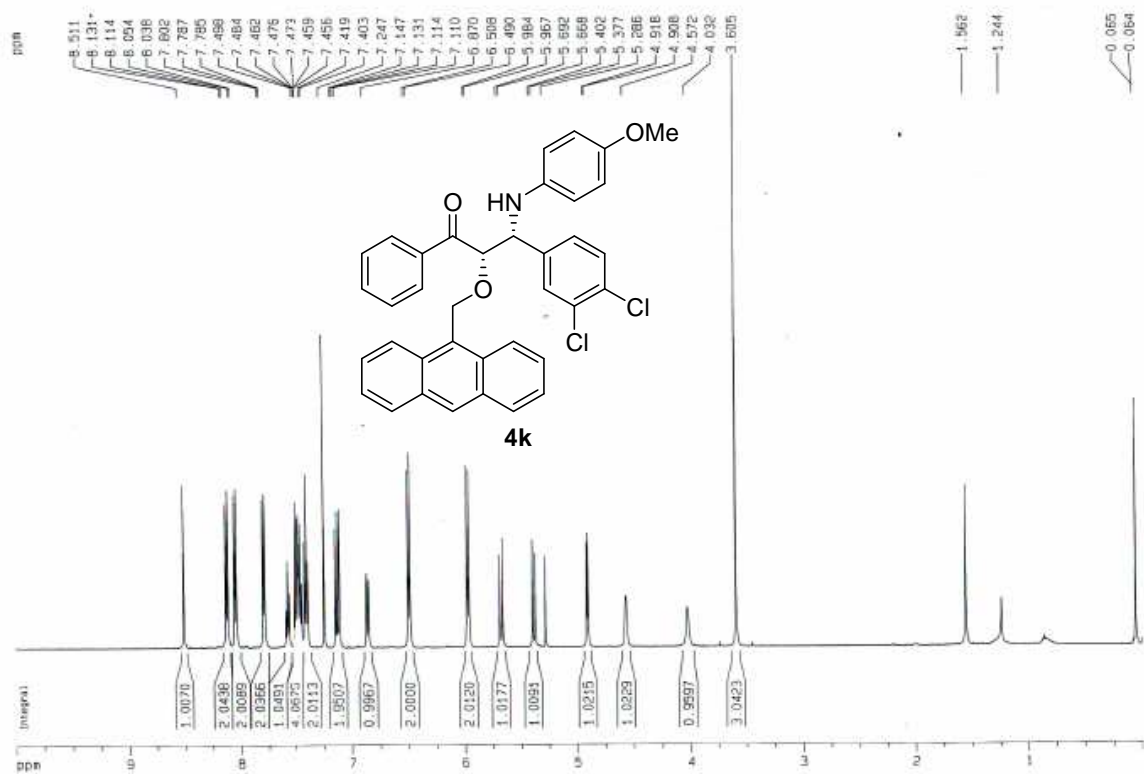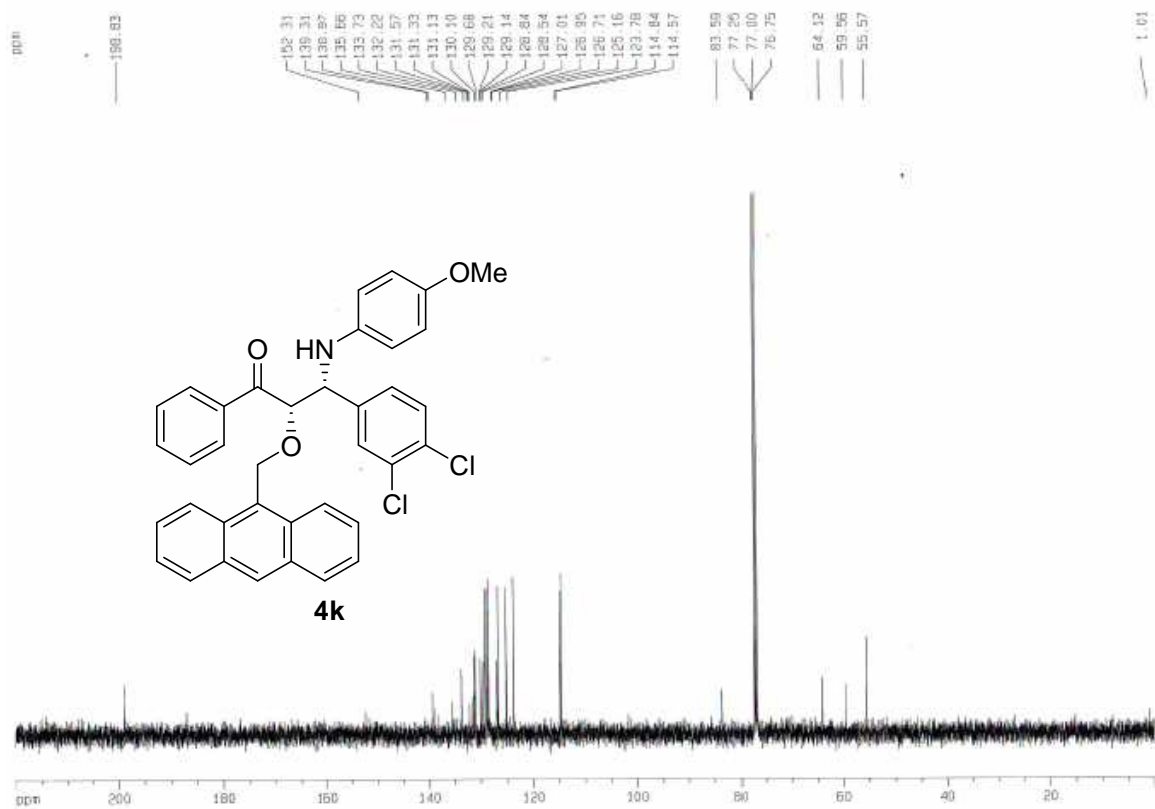

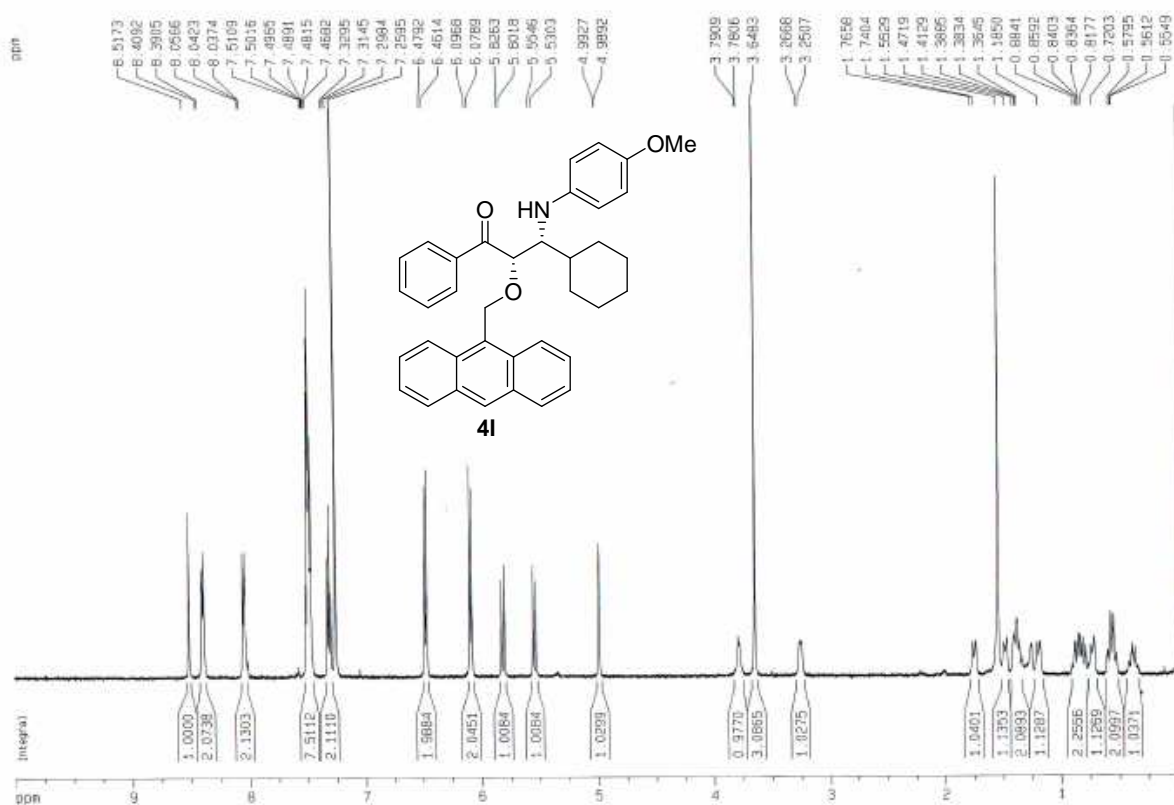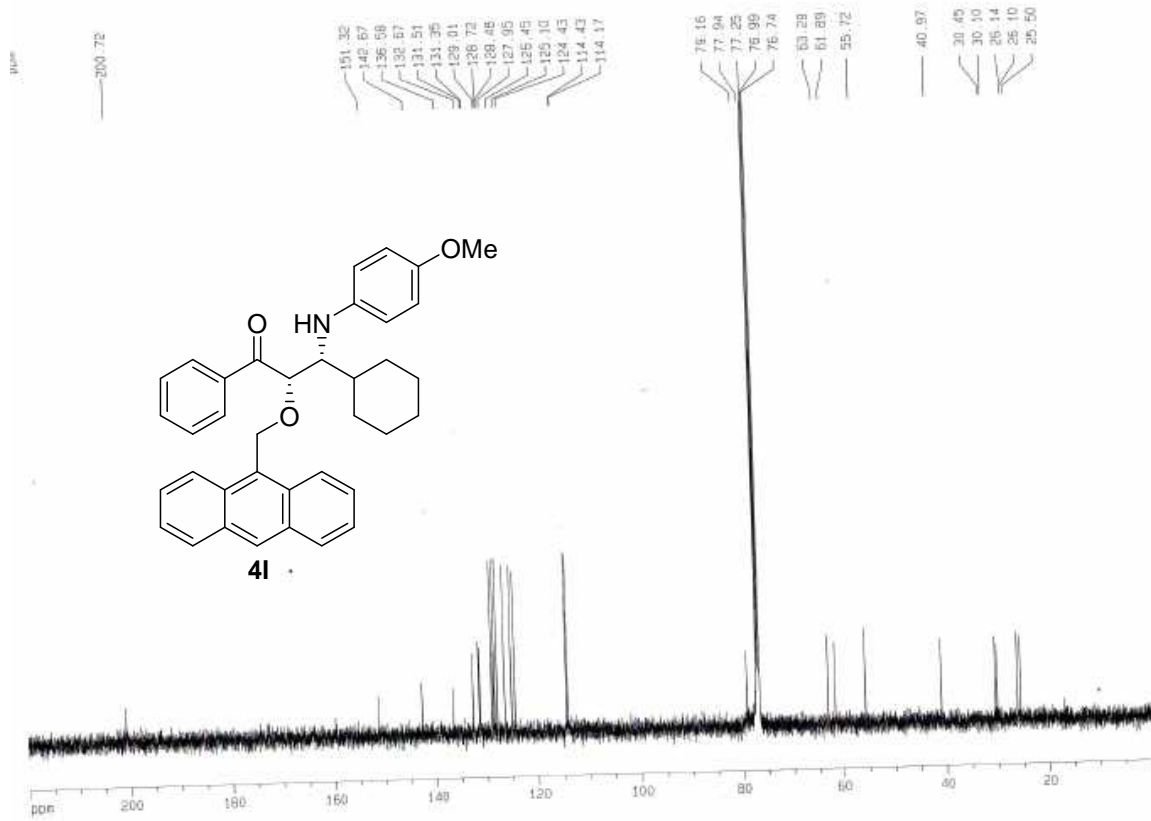

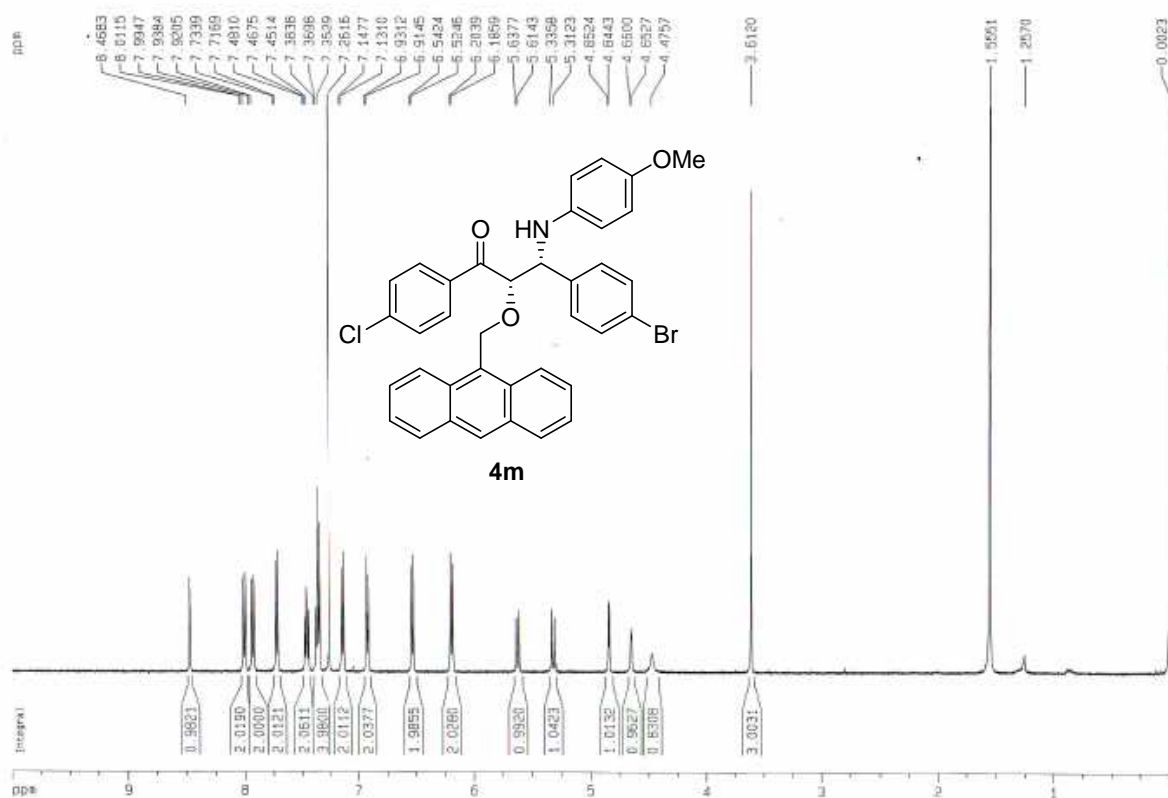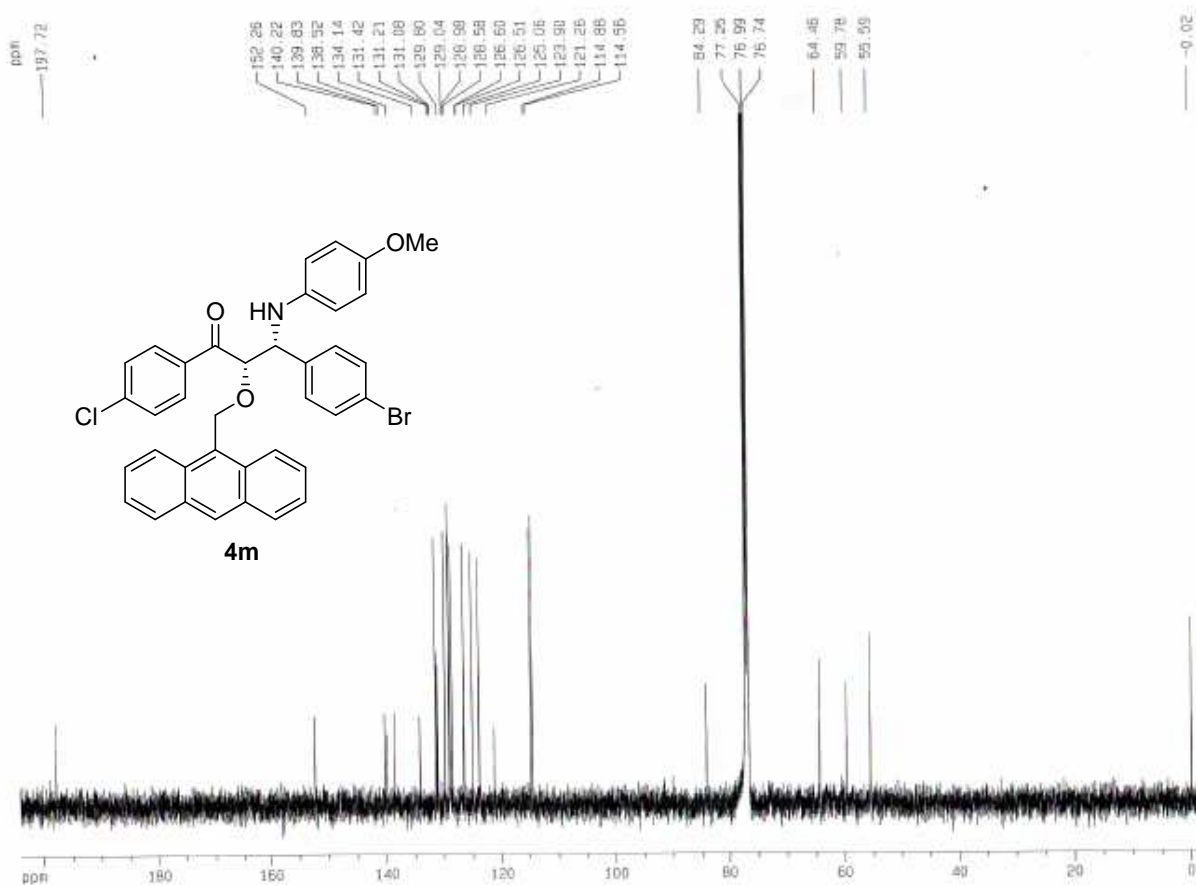

D:\WHH\HZ6\XXX\XXXF111122H.als

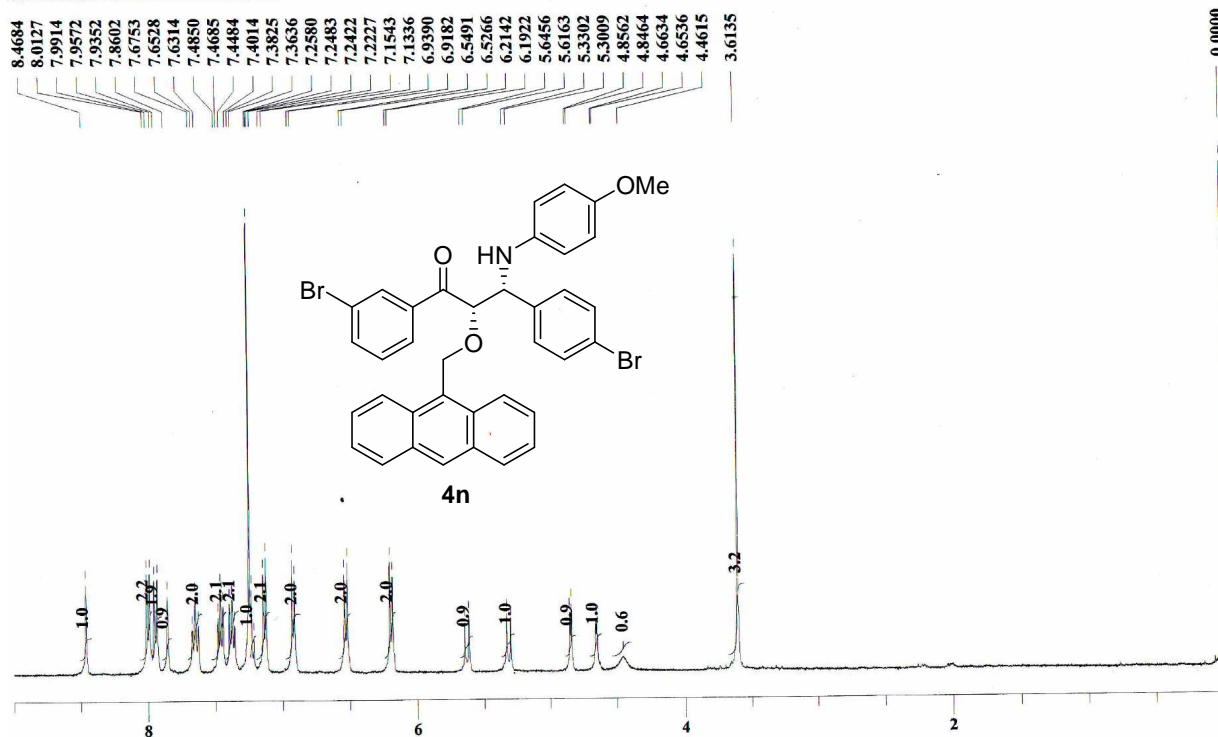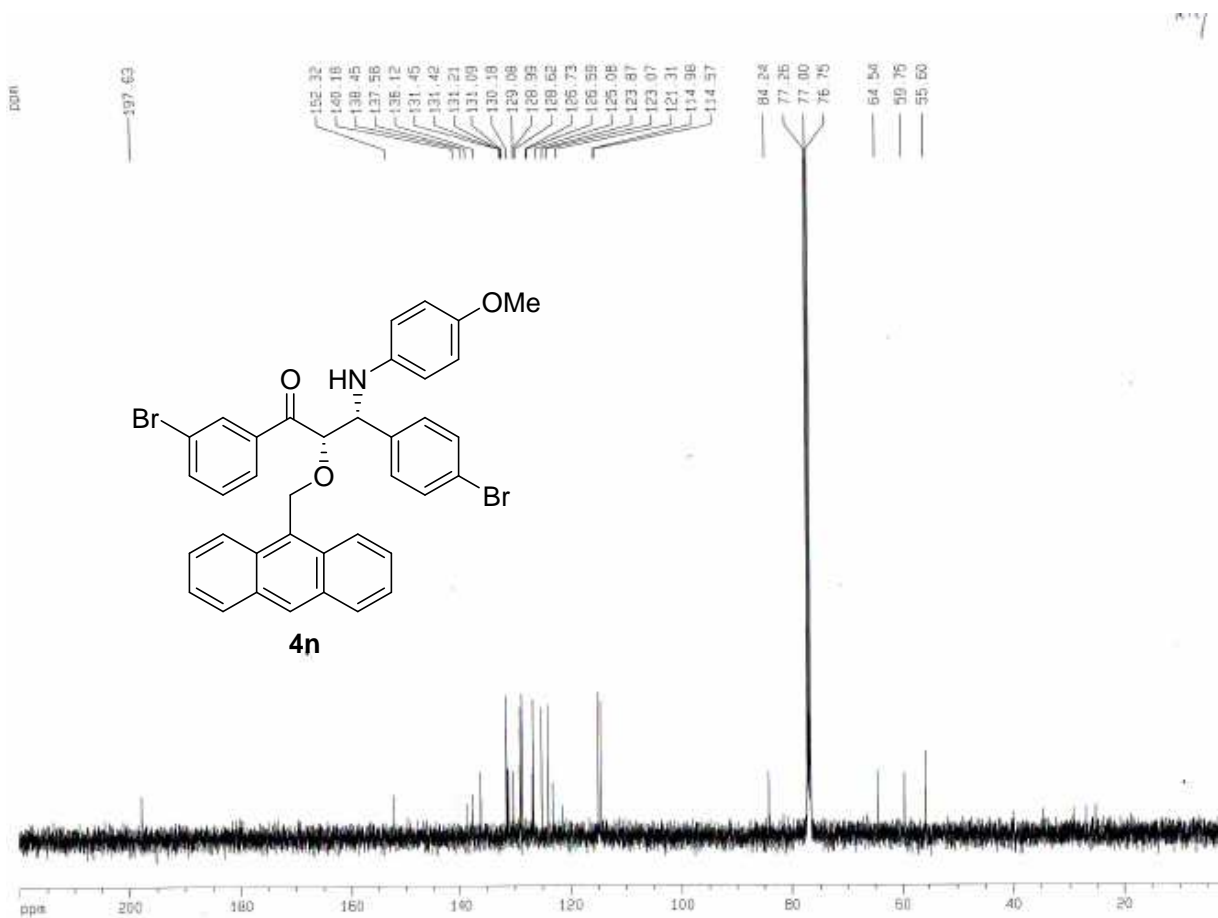

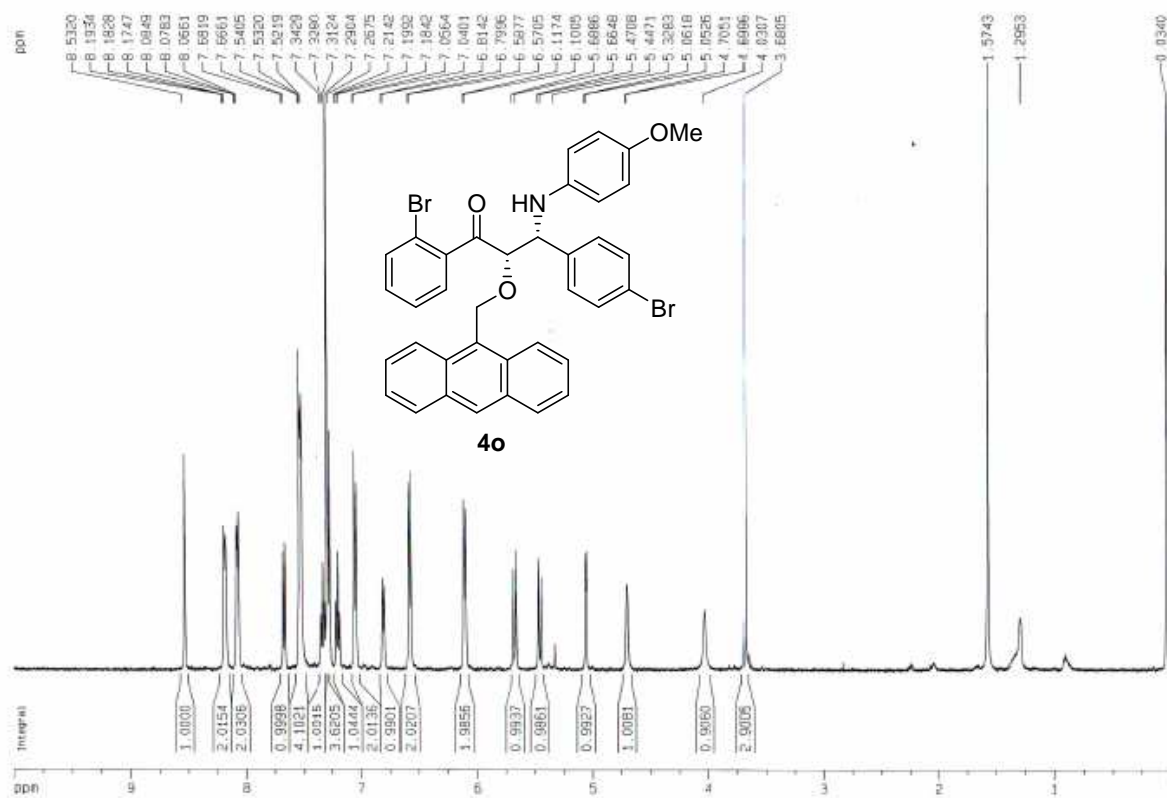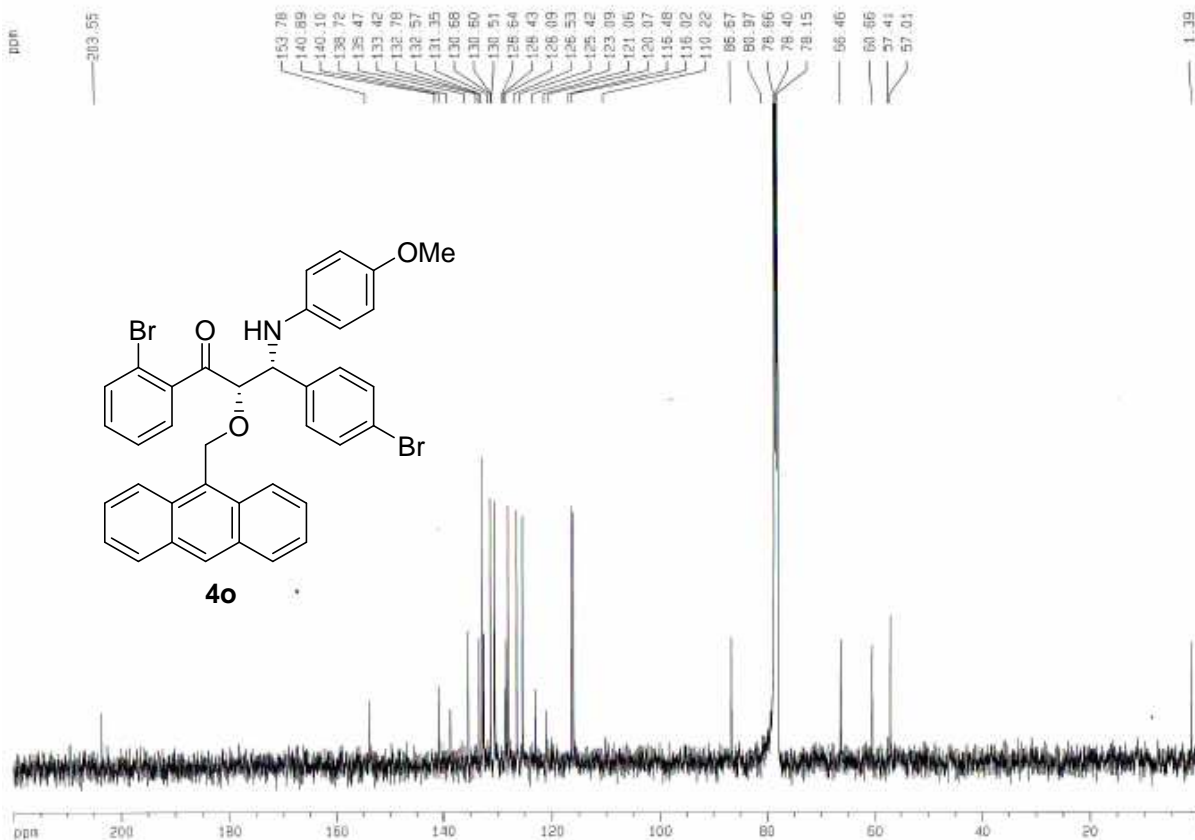



### xxfA-1-race

实验单位: ecnu  
实验时间: 2009-10-11, 18:06:05  
谱图文件: C:\浙大智达\N2000\ecnu\xxf\xxfA-1-race.mdy

实验者: xxf  
报告时间: 2009-10-12, 21:16:26  
积分方法: 面积归一法

实验内容简介:  
column: IA  
M.P.: n-hex/i-prOH:EtOH=450: 25:25  
Detection: 254nm  
flow: 1.0ml/min

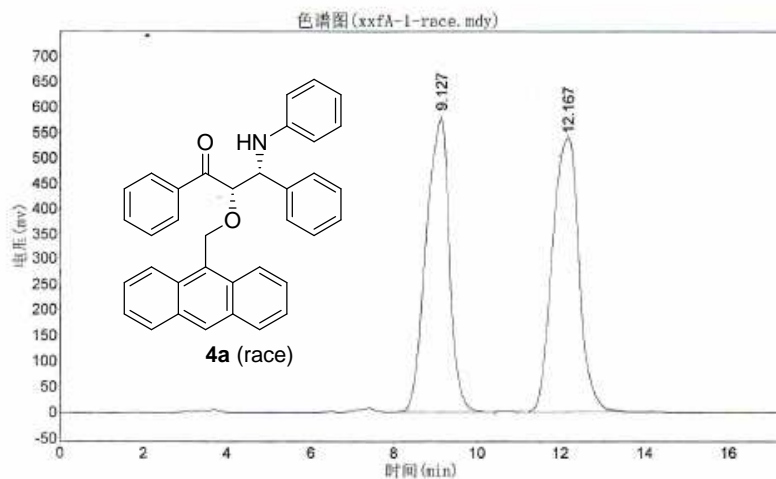

分析结果表

| 峰号 | 峰名 | 保留时间   | 峰高          | 峰面积          | 含量       |
|----|----|--------|-------------|--------------|----------|
| 1  |    | 9.127  | 574347.875  | 22463364.000 | 48.7741  |
| 2  |    | 12.167 | 538043.500  | 23592538.000 | 51.2259  |
| 总计 |    |        | 1112391.375 | 46055902.000 | 100.0000 |

### xxfA-1-cat

实验单位: ecnu  
实验时间: 2009-10-11, 18:04:05  
谱图文件: C:\浙大智达\N2000\ecnu\xxf\xxfA-1-cat.mdy

实验者: xxf  
报告时间: 2009-10-12, 21:13:42  
积分方法: 面积归一法

实验内容简介:  
column: IA  
M.P.: n-hex/i-prOH:EtOH=450: 25:25  
Detection: 254nm  
flow: 1.0ml/min

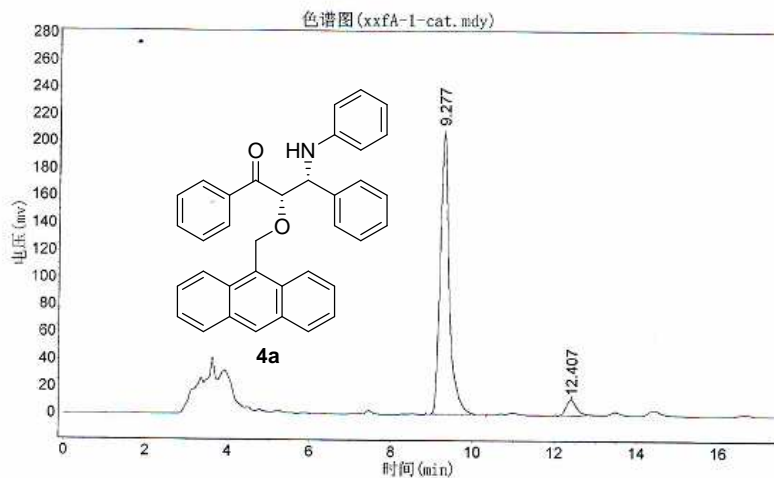

分析结果表

| 峰号 | 峰名 | 保留时间   | 峰高         | 峰面积         | 含量       |
|----|----|--------|------------|-------------|----------|
| 1  |    | 9.277  | 205792.047 | 3239726.000 | 95.8144  |
| 2  |    | 12.407 | 11293.880  | 199999.500  | 4.1856   |
| 总计 |    |        | 217085.927 | 3439725.500 | 100.0000 |

### xxfA-2-race

实验单位: ecnu  
实验时间: 2009-10-12, 20:55:43  
谱图文件: C:\浙大智达\N2000\ecnu\xxf\xxfA-2-race.ndy

实验者: xxf  
报告时间: 2009-10-12, 20:55:45  
积分方法: 面积归一法

实验内容简介:  
column: AD-H  
M.P.: n-hex/1-prOH:EtOH=450: 25:25  
Detection: 254nm  
flow: 1.0ml/min

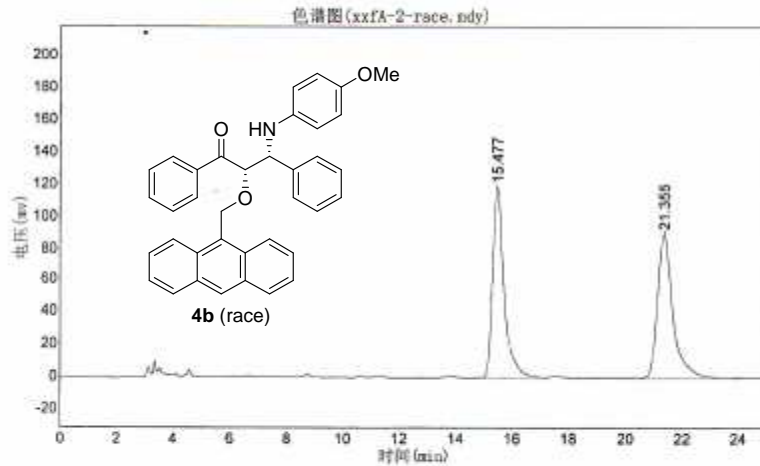

分析结果表

| 峰号 | 峰名 | 保留时间   | 峰高         | 峰面积         | 含量       |
|----|----|--------|------------|-------------|----------|
| 1  |    | 15.477 | 118859.219 | 3307132.000 | 49.8177  |
| 2  |    | 21.355 | 89624.461  | 3331333.750 | 50.1823  |
| 总计 |    |        | 208483.680 | 6638465.750 | 100.0000 |

### xxfA-2-cat

实验单位: ecnu  
实验时间: 2009-10-12, 20:30:55  
谱图文件: C:\浙大智达\N2000\ecnu\xxf\xxfA-2-cat.ndy

实验者: xxf  
报告时间: 2009-10-12, 20:32:48  
积分方法: 面积归一法

实验内容简介:  
column: AD-H  
M.P.: n-hex/1-prOH:EtOH=450: 25:25  
Detection: 254nm  
flow: 1.0ml/min

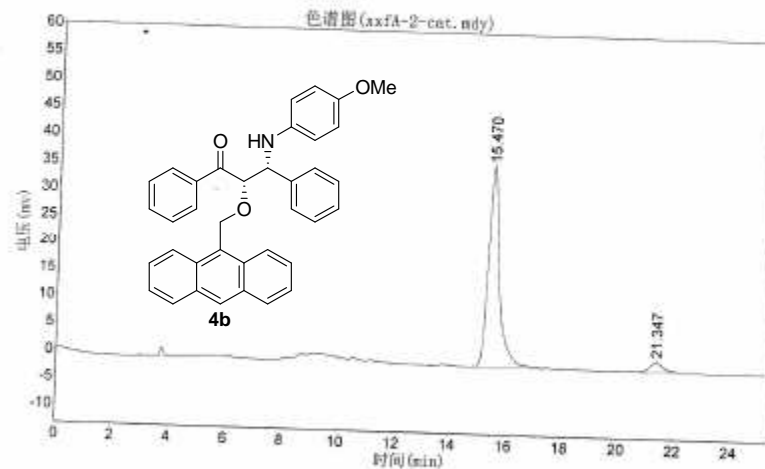

分析结果表

| 峰号 | 峰名 | 保留时间   | 峰高        | 峰面积         | 含量       |
|----|----|--------|-----------|-------------|----------|
| 1  |    | 15.470 | 36902.020 | 1016982.438 | 95.2449  |
| 2  |    | 21.347 | 1623.470  | 50772.902   | 4.7551   |
| 总计 |    |        | 38525.489 | 1067755.340 | 100.0000 |

### xxfA-9-race

实验单位: ecnu  
实验时间: 2009-10-15, 19:29:11  
谱图文件: C:\浙大智达\N2000\ecnu\xxf\xxf-9-race.mdy

实验者: xxf  
报告时间: 2009-10-15, 19:29:13  
积分方法: 面积归一法

实验内容简介:  
column: IA  
M. P.: n-hex/i-prOH:EtOH=450:25:25  
Detection: 254nm  
flow: 1.0ml/min

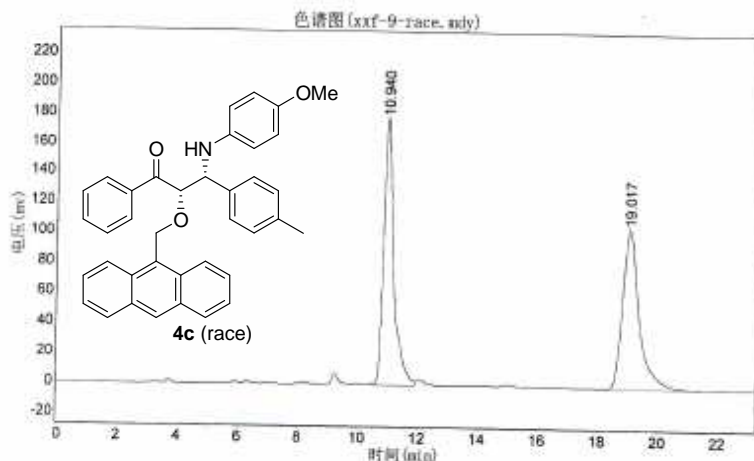

分析结果表

| 峰号 | 峰名 | 保留时间   | 峰高         | 峰面积         | 含量       |
|----|----|--------|------------|-------------|----------|
| 1  |    | 10.940 | 177097.875 | 4135777.750 | 50.4552  |
| 2  |    | 19.017 | 105085.758 | 4061160.000 | 49.5448  |
| 总计 |    |        | 282183.633 | 8196937.750 | 100.0000 |

### xxfA-9-cat

实验单位: ecnu  
实验时间: 2009-10-15, 20:14:28  
谱图文件: C:\浙大智达\N2000\ecnu\xxf\xxf-9-cat.mdy

实验者: xxf  
报告时间: 2009-10-15, 20:14:33  
积分方法: 面积归一法

实验内容简介:  
column: IA  
M. P.: n-hex/i-prOH:EtOH=450:25:25  
Detection: 254nm  
flow: 1.0ml/min

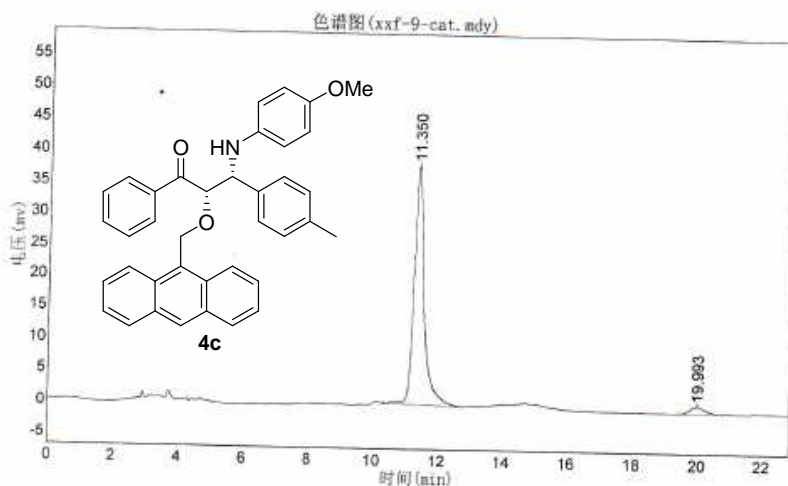

分析结果表

| 峰号 | 峰名 | 保留时间   | 峰高        | 峰面积        | 含量       |
|----|----|--------|-----------|------------|----------|
| 1  |    | 11.350 | 38039.211 | 827199.125 | 96.0360  |
| 2  |    | 19.993 | 1094.299  | 34144.000  | 3.9640   |
| 总计 |    |        | 39133.510 | 861343.125 | 100.0000 |

N2000 数据工作站

xxfA-14-race

实验单位: ecnu  
实验时间: 2009-10-21, 21:33:01  
谱图文件: C:\浙大智达\N2000\ecnu\xxf\xxf-14-race.mdy

实验者: xxf  
报告时间: 2009-10-21, 21:34:28  
积分方法: 面积归一法

实验内容简介:  
column: IA  
M.P.: n-hex:EtOH:iPrOH=450:25:25  
Detection: 254nm  
flow: 1.0ml/min

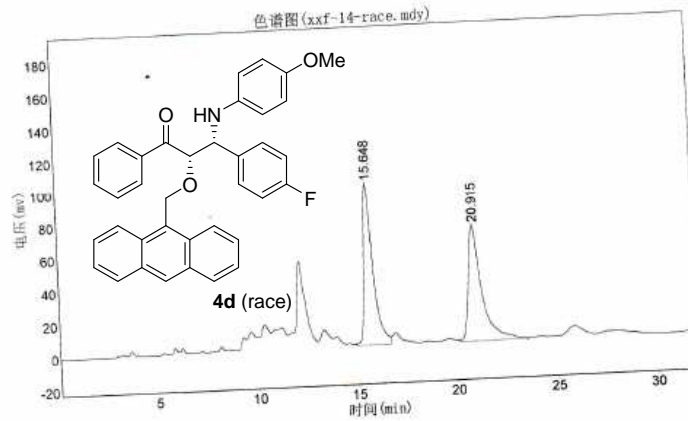

分析结果表

| 峰号 | 峰名 | 保留时间   | 峰高         | 峰面积         | 含量       |
|----|----|--------|------------|-------------|----------|
| 1  |    | 15.648 | 99388.836  | 3258567.500 | 49.4157  |
| 2  |    | 20.915 | 69900.914  | 3335621.250 | 50.5843  |
| 总计 |    |        | 169289.750 | 6594188.750 | 100.0000 |

xxfA-14-cat

实验单位: ecnu  
实验时间: 2009-10-21, 21:36:29  
谱图文件: C:\浙大智达\N2000\ecnu\xxf\xxf-14-cat.mdy

实验者: xxf  
报告时间: 2009-10-21, 21:36:34  
积分方法: 面积归一法

实验内容简介:  
column: IA  
M.P.: n-hex:EtOH:iPrOH=450:25:25  
Detection: 254nm  
flow: 1.0ml/min

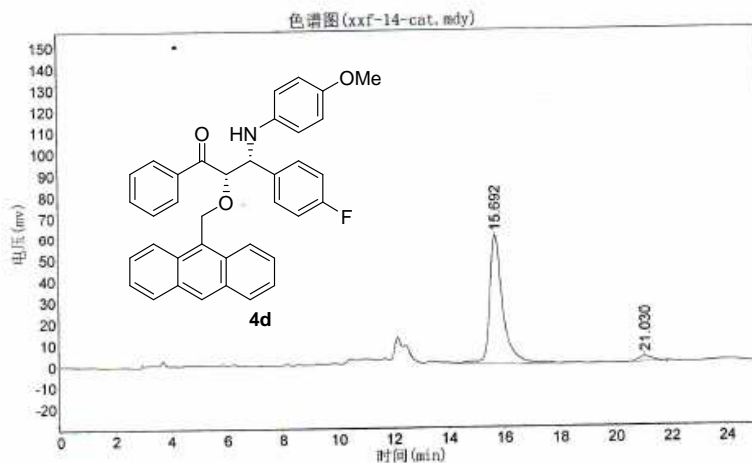

分析结果表

| 峰号 | 峰名 | 保留时间   | 峰高        | 峰面积         | 含量       |
|----|----|--------|-----------|-------------|----------|
| 1  |    | 15.692 | 60346.598 | 1930923.625 | 95.9030  |
| 2  |    | 21.030 | 2424.204  | 82488.500   | 4.0970   |
| 总计 |    |        | 62770.802 | 2013412.125 | 100.0000 |

### xxfA-8-race

实验单位: ecnu  
实验时间: 2009-10-21, 21:31:52  
谱图文件: C:\浙大智达\N2000\ecnu\xxf\xxf-8-race.mdy

实验者: xxf  
报告时间: 2009-10-21, 21:40:25  
积分方法: 面积归一法

实验内容简介:  
column: IA  
M.P.: n-hex:EtOH:iPrOH=450:25:25  
Detection: 254nm  
Flow: 1.0ml/min

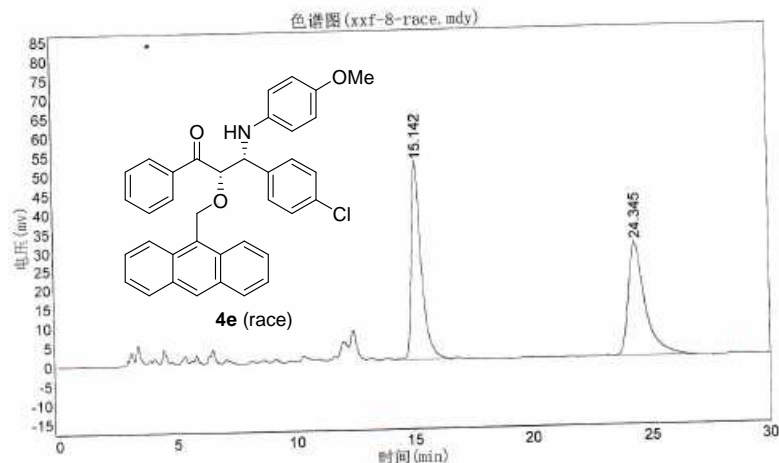

分析结果表

| 峰号 | 峰名 | 保留时间   | 峰高        | 峰面积         | 含量       |
|----|----|--------|-----------|-------------|----------|
| 1  |    | 15.142 | 51238.605 | 1509629.125 | 50.8091  |
| 2  |    | 24.345 | 29662.867 | 1461551.125 | 49.1909  |
| 总计 |    |        | 80901.473 | 2971180.250 | 100.0000 |

### xxfA-8-cat

实验单位: ecnu  
实验时间: 2009-10-21, 22:14:21  
谱图文件: C:\浙大智达\N2000\ecnu\xxf\xxf-8-cat.mdy

实验者: xxf  
报告时间: 2009-10-21, 22:14:25  
积分方法: 面积归一法

实验内容简介:  
column: IA  
M.P.: n-hex:EtOH:iPrOH=450:25:25  
Detection: 254nm  
flow: 1.0ml/min

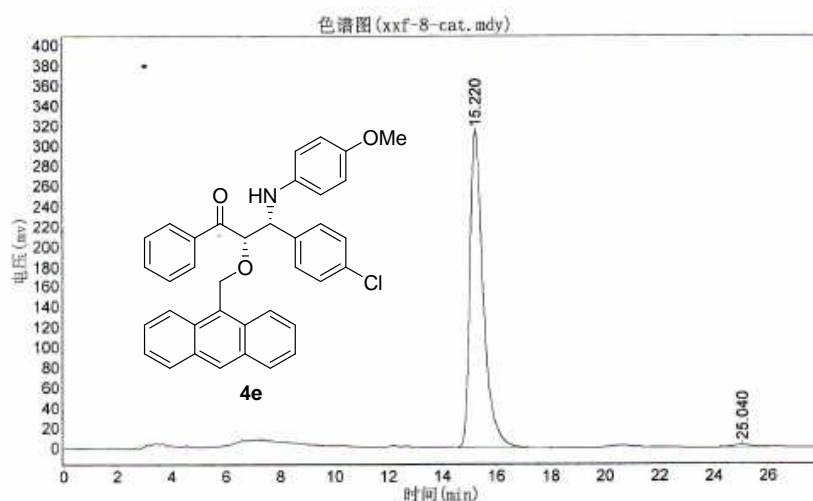

分析结果表

| 峰号 | 峰名 | 保留时间   | 峰高         | 峰面积          | 含量       |
|----|----|--------|------------|--------------|----------|
| 1  |    | 15.220 | 312615.281 | 10765735.000 | 98.8979  |
| 2  |    | 25.040 | 2354.734   | 119968.547   | 1.1021   |
| 总计 |    |        | 314970.016 | 10885703.547 | 100.0000 |

### xxfA-6-race

实验单位: ecnu  
实验时间: 2009-10-14, 21:44:44  
谱图文件: C:\浙大智达\N2000\ecnu\xxf\xxfA-6-race.mdy

实验者: xxf  
报告时间: 2009-10-14, 22:18:04  
积分方法: 面积归一法

实验内容简介:  
column: IA  
M.P.: n-hex/i-PrOH:EtOH=450:25:25  
Detection: 254nm  
flow: 1.0ml/min

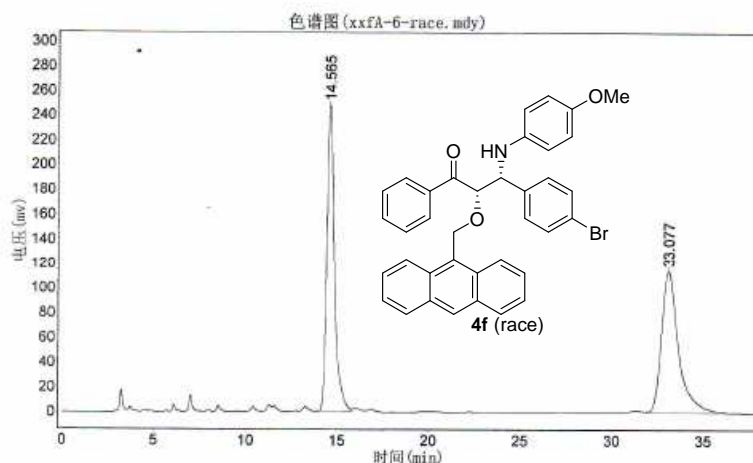

分析结果表

| 峰号 | 峰名 | 保留时间   | 峰高         | 峰面积          | 含量       |
|----|----|--------|------------|--------------|----------|
| 1  |    | 14.565 | 247906.078 | 7125321.500  | 49.3430  |
| 2  |    | 33.077 | 114085.984 | 7315081.000  | 50.6570  |
| 总计 |    |        | 361992.063 | 14440402.500 | 100.0000 |

### xxfA-6-cat

实验单位: ecnu  
实验时间: 2009-10-14, 22:17:54  
谱图文件: C:\浙大智达\N2000\ecnu\xxf\0910140006.org

实验者: xxf  
报告时间: 2009-10-14, 23:04:39  
积分方法: 面积归一法

实验内容简介:  
column: IA  
M.P.: n-hex/i-PrOH:EtOH=450:25:25  
Detection: 254nm  
flow: 1.0ml/min

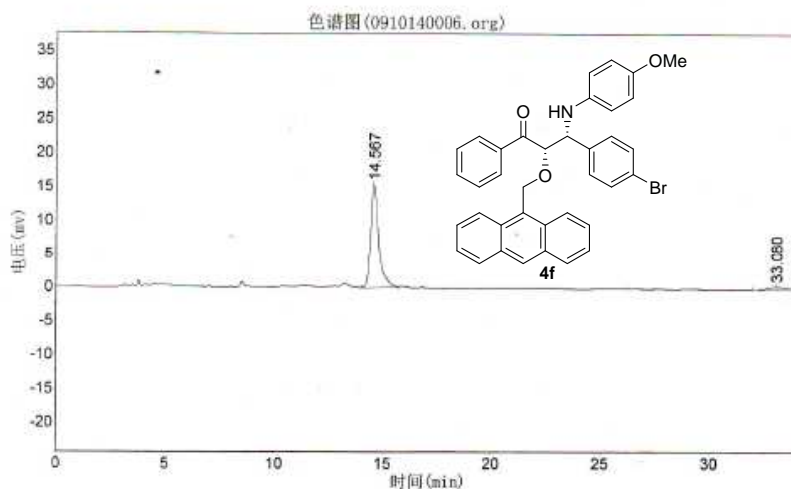

分析结果表

| 峰号 | 峰名 | 保留时间   | 峰高        | 峰面积        | 含量       |
|----|----|--------|-----------|------------|----------|
| 1  |    | 14.567 | 15251.572 | 396888.250 | 96.4136  |
| 2  |    | 33.080 | 312.681   | 14763.301  | 3.5864   |
| 总计 |    |        | 15564.253 | 411651.551 | 100.0000 |

### xxf-12-race

实验单位: ecnu  
实验时间: 2009-10-20, 21:55:44  
谱图文件: C:\浙大智达\N2000\ecnu\xxf\xxf-12-race.mdy

实验者: xxf  
报告时间: 2009-10-20, 21:56:04  
积分方法: 面积归一法

实验内容简介:  
column: IA  
M. P.: n-hex:EtOH:iPrOH=450:25:25  
Detection: 254nm  
flow: 1.0ml/min

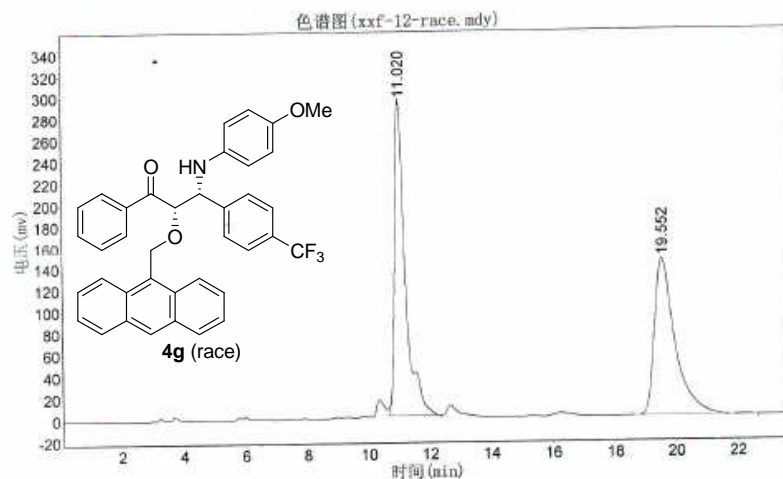

分析结果表

| 峰号 | 峰名 | 保留时间   | 峰高         | 峰面积          | 含量       |
|----|----|--------|------------|--------------|----------|
| 1  |    | 11.020 | 289926.469 | 6978408.500  | 50.9691  |
| 2  |    | 19.552 | 143872.297 | 6713035.000  | 49.0309  |
| 总计 |    |        | 433798.766 | 13691443.500 | 100.0000 |

### xxfA-12-cat

实验单位: ecnu  
实验时间: 2009-10-20, 21:18:00  
谱图文件: C:\浙大智达\N2000\ecnu\xxf\xxf-12-cat.mdy

实验者: xxf  
报告时间: 2009-10-20, 21:18:29  
积分方法: 面积归一法

实验内容简介:  
column: IA  
M. P.: n-hex:EtOH:iPrOH=450:25:25  
Detection: 254nm  
flow: 1.0ml/min

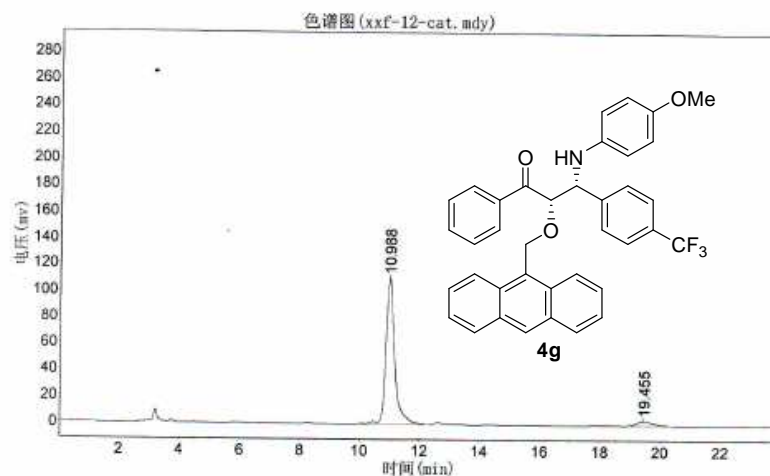

分析结果表

| 峰号 | 峰名 | 保留时间   | 峰高         | 峰面积         | 含量       |
|----|----|--------|------------|-------------|----------|
| 1  |    | 10.988 | 110609.195 | 2259188.000 | 94.9826  |
| 2  |    | 19.455 | 3185.675   | 119339.547  | 5.0174   |
| 总计 |    |        | 113794.870 | 2378527.547 | 100.0000 |

N2000 数据工作站

xxfA-10-race

实验单位: ecnu  
实验时间: 2009-10-19, 18:53:13  
谱图文件: C:\浙大智达\N2000\ecnu\xxf\0910160008.org

实验者: xxf  
报告时间: 2009-10-19, 18:57:40  
积分方法: 面积归一法

实验内容简介:  
column: IA  
M.P.: n-hex:EtOH:iPrOH=450:25:25  
Detection: 254nm  
flow: 1.0ml/min

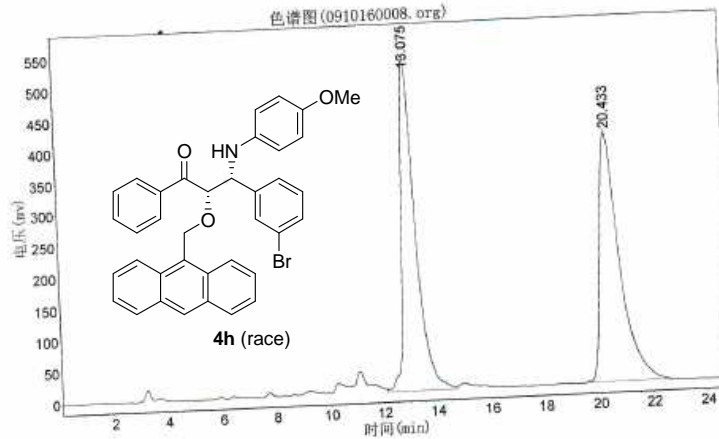

分析结果表

| 峰号 | 峰名 | 保留时间   | 峰高         | 峰面积          | 含量       |
|----|----|--------|------------|--------------|----------|
| 1  |    | 13.075 | 531837.938 | 19222812.000 | 49.0038  |
| 2  |    | 20.433 | 396326.000 | 20004406.000 | 50.9962  |
| 总计 |    |        | 928163.938 | 39227218.000 | 100.0000 |

N2000 数据工作站

xxfA-10-cat

实验单位: ecnu  
实验时间: 2009-10-19, 19:44:35  
谱图文件: C:\浙大智达\N2000\ecnu\xxf\xxfA-10-cat.mdy

实验者: xxf  
报告时间: 2009-10-19, 19:44:40  
积分方法: 面积归一法

实验内容简介:  
column: IA  
M.P.: n-hex:EtOH:iPrOH=450:25:25  
Detection: 254nm  
flow: 1.0ml/min

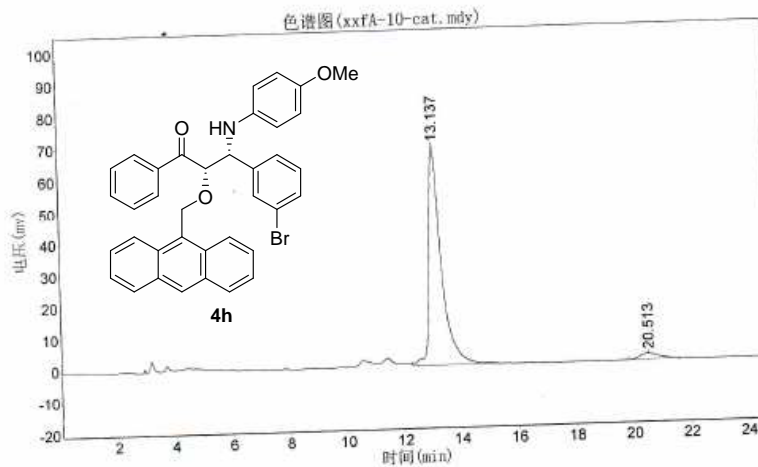

分析结果表

| 峰号 | 峰名 | 保留时间   | 峰高        | 峰面积         | 含量       |
|----|----|--------|-----------|-------------|----------|
| 1  |    | 13.137 | 69002.773 | 2084069.125 | 96.0782  |
| 2  |    | 20.513 | 1832.017  | 85069.805   | 3.9218   |
| 总计 |    |        | 70834.790 | 2169138.930 | 100.0000 |



### xxfA-11-race

实验单位: ecnu  
实验时间: 2009-10-22, 21:06:30  
谱图文件: C:\浙大智达\N2000\ecnu\xxf\xxfA-11-race.mdy

实验者: xxf  
报告时间: 2009-10-23, 19:36:48  
积分方法: 面积归一法

实验内容简介:  
column: IA  
M.P.: n-hex:iPrOH:TFA=90:10:0.1  
Detection: 254nm  
flow: 1.0ml/min

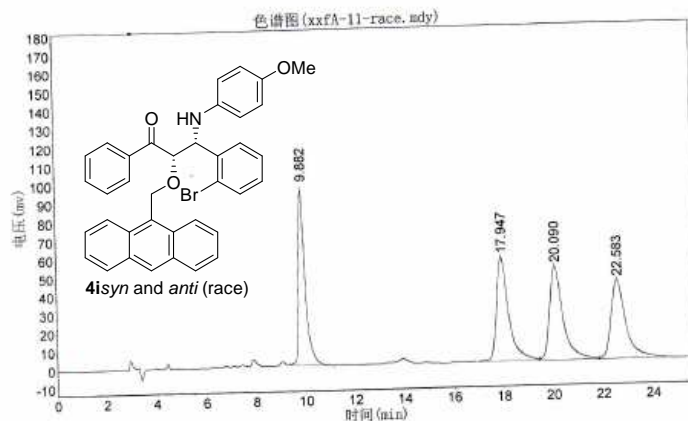

分析结果表

| 峰号 | 峰名 | 保留时间   | 峰高         | 峰面积         | 含量       |
|----|----|--------|------------|-------------|----------|
| 1  |    | 9.882  | 94783.313  | 1744212.625 | 24.0207  |
| 2  |    | 17.947 | 56171.496  | 1884958.750 | 25.9590  |
| 3  |    | 20.090 | 50645.625  | 1880226.750 | 25.8938  |
| 4  |    | 22.583 | 42464.711  | 1751895.125 | 24.1265  |
| 总计 |    |        | 244065.145 | 7261293.250 | 100.0000 |

### xxfA-11-cat

实验单位: ecnu  
实验时间: 2009-10-23, 19:44:15  
谱图文件: C:\浙大智达\N2000\ecnu\xxf\xxfA-11-cat.mdy

实验者: xxf  
报告时间: 2009-10-23, 19:44:17  
积分方法: 面积归一法

实验内容简介:  
column: IA  
M.P.: n-hex:iPrOH:TFA=90:10:0.1  
Detection: 254nm  
flow: 1.0ml/min

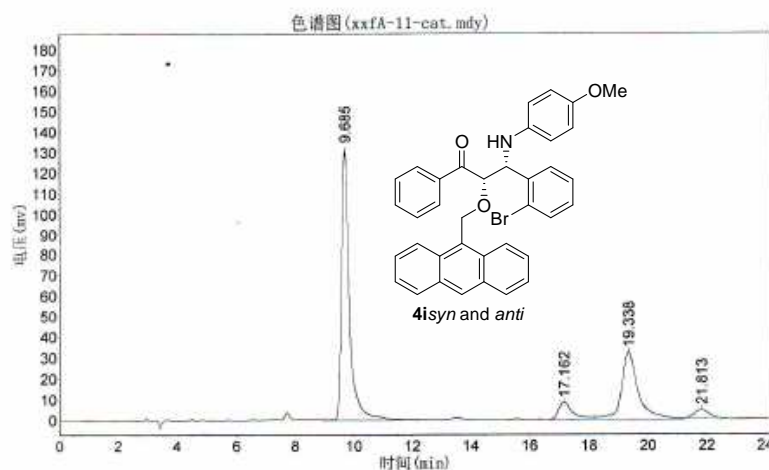

分析结果表

| 峰号 | 峰名 | 保留时间   | 峰高         | 峰面积         | 含量       |
|----|----|--------|------------|-------------|----------|
| 1  |    | 9.685  | 130138.070 | 2442453.500 | 59.4209  |
| 2  |    | 17.162 | 8421.843   | 287229.281  | 6.9878   |
| 3  |    | 19.338 | 32260.693  | 1253795.250 | 30.5028  |
| 4  |    | 21.813 | 4015.497   | 126949.805  | 3.0885   |
| 总计 |    |        | 174836.104 | 4110427.836 | 100.0000 |

### xxfA-19-race

实验单位: ecnu  
实验时间: 2009-10-23, 21:33:41  
谱图文件: C:\浙大智达\N2000\ecnu\xxf\xxfA-19-race.mdy

实验者: xxf  
报告时间: 2009-10-23, 21:33:43  
积分方法: 面积归一法

实验内容简介:  
column: IA  
M. P.: n-hex:iPrOH:TFA=90:10:0.1  
Detection: 254nm  
Flow: 1.0ml/min

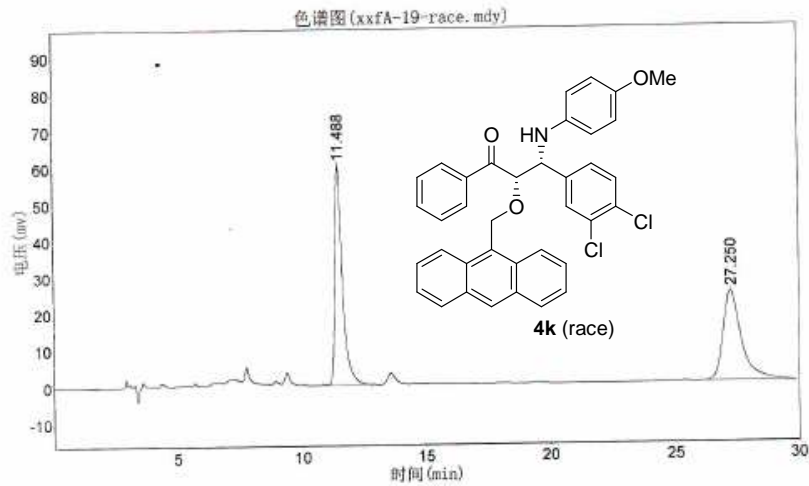

分析结果表

| 峰号 | 峰名 | 保留时间   | 峰高        | 峰面积         | 含量       |
|----|----|--------|-----------|-------------|----------|
| 1  |    | 11.488 | 59867.754 | 1269871.750 | 50.4522  |
| 2  |    | 27.250 | 24396.568 | 1247107.500 | 49.5478  |
| 总计 |    |        | 84264.322 | 2516979.250 | 100.0000 |

### xxfA-19-cat

实验单位: ecnu  
实验时间: 2009-10-23, 22:04:49  
谱图文件: C:\浙大智达\N2000\ecnu\xxf\xxfA-19-cat.mdy

实验者: xxf  
报告时间: 2009-10-23, 22:04:51  
积分方法: 面积归一法

实验内容简介:  
column: IA  
M. P.: n-hex:iPrOH:TFA=90:10:0.1  
Detection: 254nm  
Flow: 1.0ml/min

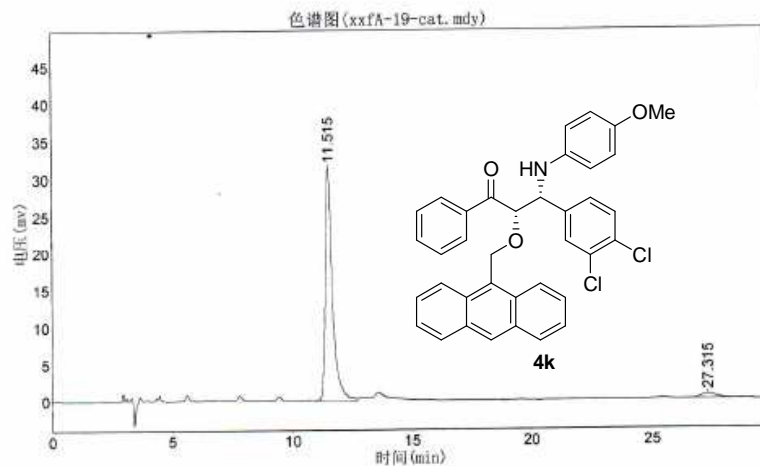

分析结果表

| 峰号 | 峰名 | 保留时间   | 峰高        | 峰面积        | 含量       |
|----|----|--------|-----------|------------|----------|
| 1  |    | 11.515 | 31436.916 | 669981.438 | 96.3954  |
| 2  |    | 27.315 | 589.046   | 25052.900  | 3.6046   |
| 总计 |    |        | 32025.962 | 695034.338 | 100.0000 |

### xxfA-24-race

实验单位: ecnu  
实验时间: 2009-12-02 20:35:57  
谱图文件: C:\浙大智达\N2000\ecnu\xxf\xxfA-25-race.ndy

实验者: xxf  
报告时间: 2009-12-02 20:35:59  
积分方法: 面积归一法

实验内容简介:  
column:AD-H  
M.P.:n-hex:iPrOH:EtOH=450:25:25  
Detection:254nm  
flow:1.0ml/min

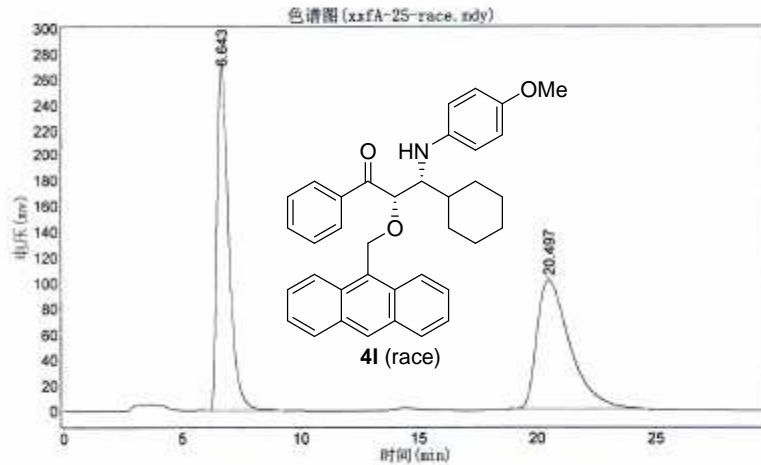

分析结果表

| 峰号 | 峰名 | 保留时间   | 峰高         | 峰面积          | 含量       |
|----|----|--------|------------|--------------|----------|
| 1  |    | 6.643  | 269927.031 | 9459776.000  | 49.0358  |
| 2  |    | 20.497 | 100988.125 | 9831780.000  | 50.9642  |
| 总计 |    |        | 370915.156 | 19291556.000 | 100.0000 |

### xxfA-24-cat

实验单位: ecnu  
实验时间: 2009-12-02 20:13:59  
谱图文件: C:\浙大智达\N2000\ecnu\xxf\xxfA-25-cat.ndy

实验者: xxf  
报告时间: 2009-12-02 20:28:28  
积分方法: 面积归一法

实验内容简介:  
column:AD-H  
M.P.:n-hex:iPrOH:EtOH=450:25:25  
Detection:254nm  
flow:1.0ml/min

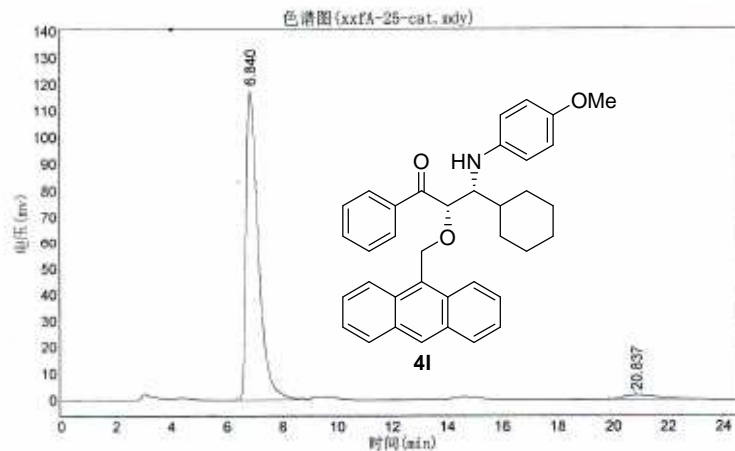

分析结果表

| 峰号 | 峰名 | 保留时间   | 峰高         | 峰面积         | 含量       |
|----|----|--------|------------|-------------|----------|
| 1  |    | 6.840  | 116156.195 | 3568235.000 | 96.6638  |
| 2  |    | 20.837 | 1514.125   | 123152.297  | 3.3362   |
| 总计 |    |        | 117670.321 | 3691387.297 | 100.0000 |

### xxfA-20-1-race

实验单位: ecnu  
实验时间: 2009-11-08, 13:02:28  
谱图文件: C:\浙大智达\N2000\ecnu\xxf\0911070001.org

实验者: xxf  
报告时间: 2009-11-08, 13:14:25  
积分方法: 面积归一法

实验内容简介:  
column: 1A  
M.P.: n-hex:i-PrOH:TFA=90: 10: 0.1  
Detection: 254nm  
flow: 1.0mL/min

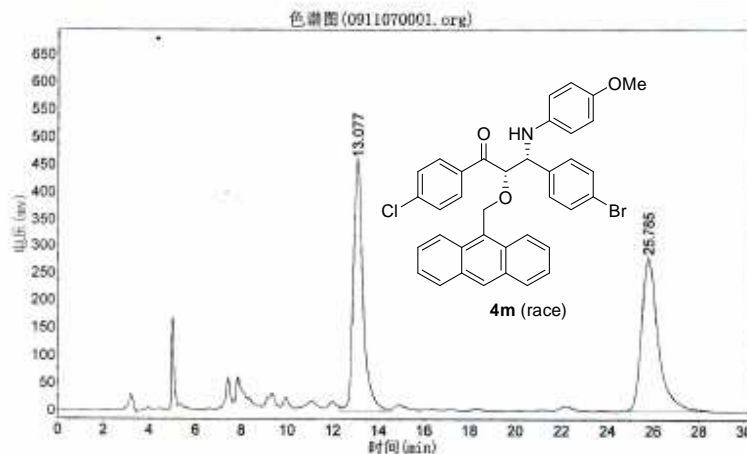

分析结果表

| 峰号 | 峰名 | 保留时间   | 峰高         | 峰面积          | 含量       |
|----|----|--------|------------|--------------|----------|
| 1  |    | 13.077 | 455736.875 | 13487067.000 | 49.1845  |
| 2  |    | 25.785 | 274832.844 | 13934325.000 | 50.8155  |
| 总计 |    |        | 730569.719 | 27421392.000 | 100.0000 |

### xxfA-20-1-cat

实验单位: ecnu  
实验时间: 2009-11-08, 14:11:33  
谱图文件: C:\浙大智达\N2000\ecnu\xxf\xxfA-20-1-cat.mdy

实验者: xxf  
报告时间: 2009-11-08, 14:11:36  
积分方法: 面积归一法

实验内容简介:  
column: 1A  
M.P.: n-hex:i-PrOH:TFA=90: 10: 0.1  
Detection: 254nm  
flow: 1.0ml/min

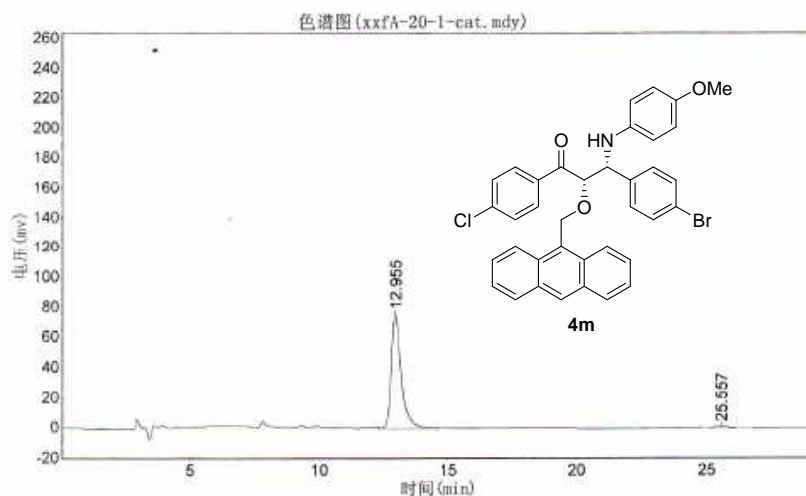

分析结果表

| 峰号 | 峰名 | 保留时间   | 峰高        | 峰面积         | 含量       |
|----|----|--------|-----------|-------------|----------|
| 1  |    | 12.955 | 76136.648 | 2056869.000 | 97.0438  |
| 2  |    | 25.557 | 1381.758  | 62657.402   | 2.9562   |
| 总计 |    |        | 77518.407 | 2119526.402 | 100.0000 |

### xxfA-22-race

实验单位: ecnu  
实验时间: 2009-11-08, 17:08:33  
谱图文件: C:\浙大智达\N2000\ecnu\xxf\xxfA-22-race.mdy

实验者: xxf  
报告时间: 2009-11-08, 17:08:35  
积分方法: 面积归一法

实验内容简介:  
column: IA  
M.P.: n-hex:i-PrOH:EtOH:TFA=500: 20: 20:1  
Detection: 254nm  
flow: 1.0ml/min

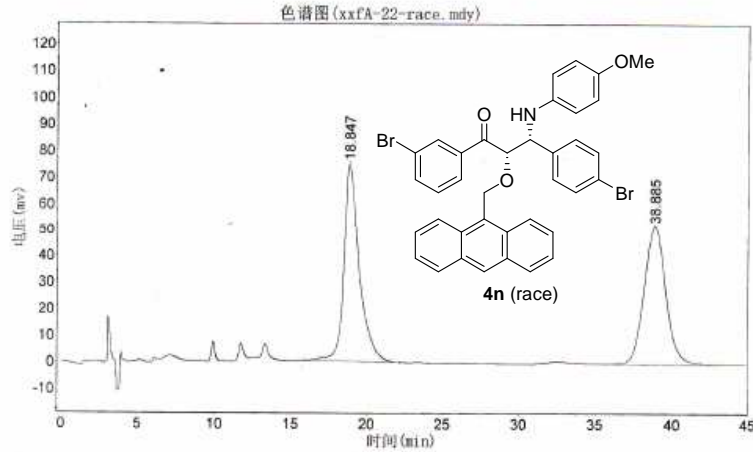

分析结果表

| 峰号 | 峰名 | 保留时间   | 峰高         | 峰面积          | 含量       |
|----|----|--------|------------|--------------|----------|
| 1  |    | 18.847 | 74562.047  | 5235161.000  | 50.6721  |
| 2  |    | 38.885 | 51818.406  | 5096290.000  | 49.3279  |
| 总计 |    |        | 126380.453 | 10331451.000 | 100.0000 |

### xxfA-22-cat

实验单位: ecnu  
实验时间: 2009-11-08, 18:38:24  
谱图文件: C:\浙大智达\N2000\ecnu\xxf\0911070009.org

实验者: xxf  
报告时间: 2009-11-08, 18:41:26  
积分方法: 面积归一法

实验内容简介:  
column: IA  
M.P.: n-hex:i-PrOH:EtOH:TFA=500: 20: 20:1  
Detection: 254nm  
flow: 1.0ml/min

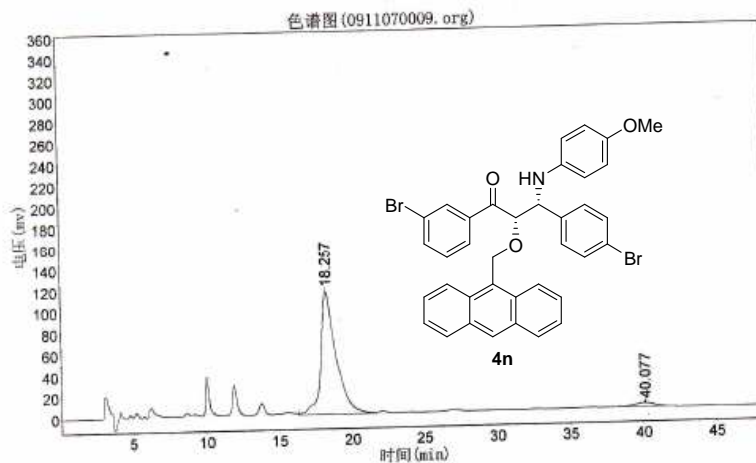

分析结果表

| 峰号 | 峰名 | 保留时间   | 峰高         | 峰面积         | 含量       |
|----|----|--------|------------|-------------|----------|
| 1  |    | 18.257 | 115746.578 | 8385583.000 | 95.9101  |
| 2  |    | 40.077 | 3582.833   | 357589.688  | 4.0899   |
| 总计 |    |        | 119329.411 | 8743172.688 | 100.0000 |

N2000 数据工作站

xxfA-24-race

实验单位: ecnu  
实验时间: 2009-12-01, 21:48:50  
谱图文件: C:\浙大智达\N2000\ecnu\xxf\xxfA-24-race.ndy

实验者: xxf  
报告时间: 2009-12-01, 21:51:08  
积分方法: 面积归一法

实验内容简介:  
column: AD-H  
M.P.: n-hex:iPrOH:EtOH=450:25:25  
Detection: 254nm  
flow: 1.0ml/min

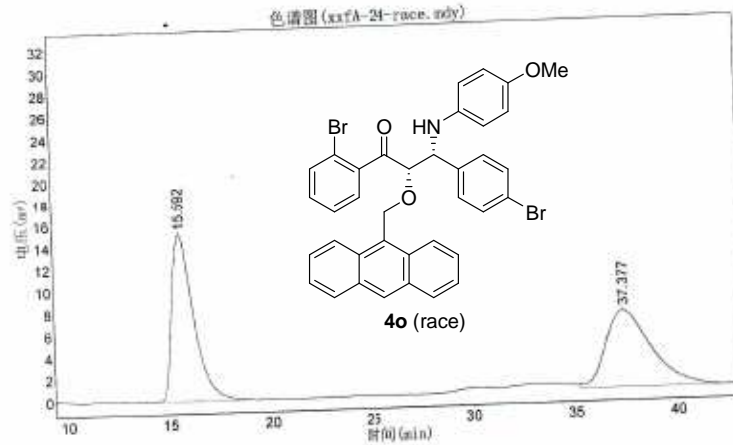

分析结果表

| 峰号 | 峰名 | 保留时间   | 峰高        | 峰面积         | 含量       |
|----|----|--------|-----------|-------------|----------|
| 1  |    | 15.592 | 15129.708 | 1120284.000 | 50.9295  |
| 2  |    | 37.377 | 6995.193  | 1079390.375 | 49.0705  |
| 总计 |    |        | 22124.901 | 2199674.375 | 100.0000 |

N2000 数据工作站

xxfA-24-cat

实验单位: ecnu  
实验时间: 2009-12-01, 22:33:53  
谱图文件: C:\浙大智达\N2000\ecnu\xxf\xxfA-24-cat.ndy

实验者: xxf  
报告时间: 2009-12-01, 22:33:57  
积分方法: 面积归一法

实验内容简介:  
column: AD-H  
M.P.: n-hex:iPrOH:EtOH=450:25:25  
Detection: 254nm  
flow: 1.0ml/min

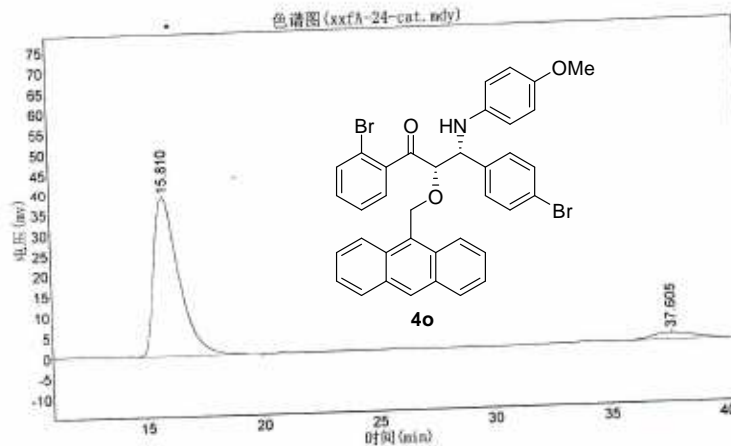

分析结果表

| 峰号 | 峰名 | 保留时间   | 峰高        | 峰面积         | 含量       |
|----|----|--------|-----------|-------------|----------|
| 1  |    | 15.810 | 38832.625 | 2891198.250 | 93.5806  |
| 2  |    | 37.605 | 1607.032  | 198328.297  | 6.4194   |
| 总计 |    |        | 40439.657 | 3089526.547 | 100.0000 |
